1 **Title**

2 Development and on-site evaluation of an easy-to-perform and low-cost food  
3 pathogen diagnostic workflow for low-resource communities

4

5 **Short title**

6 Simple and low-cost diagnostic platform for low-resource communities

7

8

9

10 Michael Glenn Mason<sup>1\*</sup>, and José Ramón Botella<sup>1\*</sup>

11 <sup>1</sup> Plant Genetic Engineering Laboratory, School of Agriculture and Food Sciences,

12 The University of Queensland, Australia.

13

14 \* To whom correspondence should be addressed. E-mail: [j.botella@uq.edu.au](mailto:j.botella@uq.edu.au).

15 Correspondence may also be addressed to: Dr Michael Mason, E-mail:

16 [Michael.Mason@uq.edu.au](mailto:Michael.Mason@uq.edu.au)

17

18

## 19 **Abstract**

20 Food-borne diseases are a leading cause of illness and death in many developing  
21 countries and thus, there is a real need to develop affordable and practical  
22 technologies that can help improve food safety in these countries. The ability to  
23 efficiently identify food pathogens is essential to allow national regulatory authorities  
24 to monitor food quality and implement safety protocols. In this study, we have  
25 developed a simple, low-cost (\$0.76 (USD)) complete food pathogen diagnostic  
26 workflow ideally suited for deployment in low-resource environments that uses a  
27 simple four step process (sample enrichment, cell lysis, DNA amplification, and  
28 naked-eye readout). The minimal number of steps and equipment involved in our  
29 diagnostic workflow, as well as the simplicity of the yes/no flocculation readout,  
30 allows non-technical personnel to perform and interpret the assay. To evaluate the  
31 system's performance, we tested the entire system on fresh produce samples  
32 collected from local farms and markets in Cambodia for the presence of the *E. coli*  
33 *O157* O-antigen polymerase, *wzy*. Although this was a proof-of-concept study, our  
34 system successfully revealed a clear correlation between the origin and condition of  
35 the produce collected and their likelihood of contamination. In conclusion, we believe  
36 that our easy-to-perform diagnostic system can have a significant impact on  
37 improving food quality and human health if adopted by regulatory authorities in  
38 developing countries due to the assay's simplicity, affordability, and adaptability.

## 40 Introduction

41 Over the last 20 years, there has been a significant increase in the incidence of food-  
42 borne diseases worldwide [1]. The risk of infection by a food-borne disease is  
43 significantly higher in developing countries due to a combination of factors including  
44 access to clean water and bathroom facilities, poor hygiene education, inadequate  
45 food production and storage practices, and either insufficient food safety legislation  
46 or poor implementation of existing legislation [2]. Most food-borne disease infections  
47 in these countries result from the consumption of perishable foods sold in informal  
48 markets [3] and, as such, food-borne diseases have become a leading cause of  
49 illness and death in developing countries [4, 5]. Hence, there is a need for low-cost  
50 and simple technologies that can help health authorities to monitor and enforce  
51 adequate levels of food safety. In addition to the health benefits, increased food  
52 safety standards would likely have economic benefits as a result of increased  
53 demand for fresh produce exports [3].

54

55 Shiga toxin-producing *Escherichia coli* (STEC) are a class of *E. coli* responsible for  
56 many food-borne outbreaks and sporadic cases of gastrointestinal illness, with a  
57 range of symptoms including haemorrhagic colitis (stomach cramping and bloody  
58 diarrhoea) and the potentially fatal hemolytic-uremic syndrome (break down of red  
59 blood cells, kidney failure, reduction in platelet cells) [6]. In the United States alone,

60 STEC strains are estimated to cause approximately 176,000 illnesses, 2,400  
61 hospitalizations, and 20 deaths each year [7]. Of all the STEC strains, the O157:H7  
62 serotype is the most common cause of foodborne illness outbreaks worldwide [8]  
63 and is the responsible for all of the deaths by STEC strains in the US [7]. Infection by  
64 *E. coli* O157:H7 is commonly thought to be associated with the consumption of  
65 undercooked meat however, infection can also occur through the consumption of  
66 fresh fruit and vegetables [7, 9, 10]. For example, outbreaks of *E. coli* O157:H7 in the  
67 United States have occurred due consumption of a variety of fresh produce including  
68 onions, bagged spinach, lettuce and unpasteurized apple juice [10-12]. Produce and  
69 water supplies used for irrigation or consumption can become contaminated by  
70 coming in contact with trace amounts of fecal waste from farm animals, which can be  
71 carriers of *E. coli* O157:H7 but are themselves unaffected by it [6, 13].

72

73 *E. coli* O157:H7's low infective dose makes it a highly effective and dangerous  
74 human pathogen as it can still cause illness even when the initial source of  
75 contamination has been significantly diluted [14]. Thus, countries typically adopt a 0  
76 CFU limit of *E. coli* O157:H7 or other STEC strains in food [15]. The standard  
77 method of identifying *E. coli* O157:H7 is an involved process that requires a trained  
78 microbiologist and takes days to complete [16, 17]. While this method is well  
79 established and highly reliable, it is not always practical, especially for developing

80 countries who have a limited number of trained personnel and testing facilities. DNA  
81 amplification-based systems can provide an alternative to detect food borne  
82 pathogens as they are low-cost, fast and relatively simple to perform [17].  
83 Polymerase chain reaction (PCR) is the conventional DNA amplification-based  
84 technique for rapid identification of DNA/RNA biomarkers [18] however, PCR-based  
85 methods require a relatively expensive thermocycler and hence are not ideally  
86 suitable for low resource environments. Isothermal DNA amplification methods,  
87 including Loop-mediated isothermal amplification (LAMP) [19], may potentially  
88 overcome equipment costs as they enable DNA amplification to be performed in a  
89 low-cost, single temperature heating device.

90

91 We have developed a flocculation-based DNA amplification readout that enables the  
92 identification of the presence of amplification even by inexperienced users [20].  
93 Thus, in this study, we sought to build upon the advantages of the isothermal DNA  
94 amplification and our flocculation readout technique to create a complete food  
95 pathogen diagnostic system tailored for developing countries. We have optimized the  
96 entire process, from food sampling to pathogen detection, aiming to simplify each  
97 step, reduce costs and ensure safety. In a proof-of-concept study, we used our  
98 diagnostic workflow to detect *E. coli* O157 in Cambodian fresh produce and

99 demonstrated that our system is capable of rapidly screening fresh produce for the  
100 presence of food pathogens in low-resource environments.

101

## 102 **Results**

### 103 **Sample processing and bacterial enrichment**

104 In modern food microbiology laboratories, a stomacher machine is typically  
105 employed to macerate tissue in growth media prior to microbial enrichment [21]. This  
106 equipment is expensive and, in the hands of poorly trained personnel, can be a  
107 source of cross-contamination resulting in false positives and misleading results. We  
108 therefore developed an equipment free version of a stomacher machine in which  
109 samples are collected and placed in individual tubes containing growth media and 3-  
110 4 metal ball bearings (S1A Fig). Vigorous shaking of the tubes macerates the tissue  
111 and aids the release food pathogens into the media which can then be enriched in  
112 an overnight incubation without the need to open the tube, minimizing the risk of  
113 cross-contamination.

114

## 115 **Rapid bacterial DNA extraction from fresh produce**

### 116 **enrichment cultures**

117 A critical part of any food pathogen molecular diagnostic is the ability to reliably,  
118 cheaply and safely extract amplifiable DNA. As the infective dose of *E. coli* O157:H7  
119 is as low as a few hundred cells [7, 14, 22], an initial enrichment step in buffered  
120 peptone media for 16-24 hours is required before detection. We reasoned that the  
121 cheapest and safest method to extract microbial DNA from enriched samples is to  
122 heat the entire culture to 95°C for 30 minutes as this will kill the bacteria in the  
123 sample and lyse the *E. coli*, which can be performed without opening the tube. To  
124 test this hypothesis, we infected Brussel sprout leaves with *E. coli* O157:H7, and  
125 subsequently processed the leaf samples as described above. Tubes containing  
126 macerated leaf tissue in buffered peptone water were incubated at 41.5°C for 24  
127 hours and then heated at 95°C for 30 minutes. Samples from the boiled culture  
128 failed to produce bacterial growth on buffered peptone agar plates, indicating that the  
129 heat treatment had killed the bacterial population and the tube was safe to open.  
130 Direct addition of 1, 2 or 4 µl of the boiled culture into LAMP reactions did not result  
131 in amplification (S1B Fig) indicating that amplification inhibitors are present in the  
132 boiled extract. However, a 25-fold dilution of the boiled extract with water prior to  
133 addition to the LAMP reaction resulted in strong amplification (S1B Fig).

134

## 135 **LAMP primer development**

136 LAMP primers were developed against a number of *E. coli* O157:H7 genes (S1  
137 Table), including the shiga toxin genes *stx1* and *stx2* [23], the O-antigen polymerase  
138 *wzy* [24, 25], the O157-specific biosynthesis gene, *rfbE* [26], and the H7 flagella  
139 antigen *fliC* [27]. The primers were used in LAMP reactions to detect the presence of  
140 *E. coli* O157:H7 in cultures generated from artificially inoculated alfalfa sprouts in  
141 three independent experiments. The *stx2-2* primer set was unreliable as it failed to  
142 amplify a product in two of the three experiments (Fig 1A) while the *fliC*, *stx2-2* and  
143 *rfbE* primer sets produced amplification products in one of the two non-inoculated  
144 control samples indicating that they are prone to false positives (Fig 1B). Based on  
145 these results, only the *wzy-1* and *stx2-1* primer sets were found to give reliable  
146 amplification of *E. coli* O157:H7.

147

148 **Figure 1. Identification of specific and reliable LAMP primers.** (A) LAMP primer  
149 sets designed for *fliC-1*, *wzy-1*, *stx2-1*, *stx2-2*, *rfbE-1* were tested for their ability to  
150 detect *E. coli* O157:H7 in three artificially inoculated Alfalfa sprout samples. (B) The  
151 same sets of LAMP primers were used in two uninoculated Alfalfa sprout control  
152 samples.

153



154 To further test the specificity of the *wzy-1* and *stx2-1* primer sets, we examined their  
155 ability to differentiate between *E. coli* O157:H7 and *Salmonella enterica*, a  
156 genetically similar pathogenic species to *E. coli* [28]. Alfalfa sprouts were inoculated  
157 with either 8 or 80 colony forming units (CFU) of *Salmonella enterica* or 1 CFU of *E.*  
158 *coli* O157:H7 and cultured enriched overnight. LAMP primers designed against the  
159 *Salmonella* invasion protein, *invA* (Table S1), were able to specifically identify the  
160 *Salmonella* infected alfalfa sprouts while no amplification products were detected in  
161 the *E. coli* O157:H7 inoculated samples and non-inoculated controls (Fig 2A). The  
162 *wzy-1* or the *stx2-1* primer sets produced strong amplifications in the *E. coli* O157:H7  
163 infected samples but not in the *Salmonella* infected samples or the non-inoculated  
164 controls (Fig 2B).

165

166 **Figure 2. Primers *wzy-1* and *stx2-1* are specific for *E. coli* O157:H7.** (A) LAMP  
167 reactions using primers targeting the *Salmonella invA* gene were performed on  
168 alfalfa sprout samples inoculated with either 8 or 80 CFU of *S. enterica serovar*  
169 *enteritidis* or 1 CFU of *E. coli* O157:H7, non-inoculated sprouts were used as  
170 controls. (B) LAMP reactions using primers *wzy-1* and *stx2-1* were performed on the  
171 samples described above.

172

173

## 174 **Stabilization of LAMP reactions to allow room temperature** 175 **transport**

176 Procurement of amplification reagents in many developing countries is problematic  
177 largely due to erratic power supplies and inadequate cold storage [29, 30]. Freeze  
178 drying of reactions could facilitate room temperature transport to, and storage at  
179 remote locations. Trehalose is commonly used as a stabilizer of biomolecules during  
180 the freeze-drying process [31, 32], however our initial attempts to freeze dry a  
181 complete LAMP reaction failed to produce an amplification product upon  
182 reconstitution with water either in the presence or absence of trehalose (Fig 3A).  
183 Further tests revealed that the presence of betaine, an essential component of the  
184 LAMP reaction, negatively affected the activity of the rehydrated reaction (Fig 3A).  
185 Therefore, the LAMP reactions were freeze-dried in the absence of betaine and  
186 subsequently resuspended in a solution containing betaine at the concentration  
187 required for the reaction. To study whether the freeze drying process can stabilize  
188 the LAMP reactions for extended periods of time, the dried reactions were left at  
189 room temperature (22 - 24°C) for 4, 8 or 21 days before being rehydrated and used  
190 to amplify purified *E. coli* O157:H7 genomic DNA. Strong amplifications were  
191 observed at all three time points with no observable loss of activity over time (Fig  
192 3B).

193

194 **Figure 3. Optimization of freeze-drying conditions.** (A) LAMP reactions  
195 containing all necessary components, including primers were freeze-dried overnight  
196 in the presence (+) or absence (-) of 5% (w/v) trehalose or 0.8 M betaine. Samples  
197 processed without betaine were subsequently rehydrated in betaine solution (0.8 M  
198 final concentration) prior to amplification using 2 ng of purified *E. coli* O157:H7  
199 genomic DNA as template. (B) Samples freeze-dried with trehalose but without  
200 betaine were left at room temperature for 4, 8 and 21 days prior to rehydration with  
201 betaine solution and amplification using 2 ng of purified *E. coli* O157:H7 DNA as  
202 template.

203

204

## 205 **Complete diagnostic workflow and proof of concept**

### 206 **testing in Cambodia**

207 The individual components developed in this study were combined to create a  
208 complete diagnostic workflow suitable for testing fresh produce for *E. coli* O157  
209 contamination (Fig 4). To test the full food pathogen diagnostic system in our  
210 laboratory, 1 g of Brussel sprout leaves inoculated with *E. coli* O157:H7, were placed  
211 in a 50 ml Falcon tube containing three metal ball bearings and 10 ml of buffered  
212 peptone. Non-inoculated leaves were used as negative controls. After shaking to  
213 disrupt the tissue, tubes were incubated at 41.5°C overnight to allow enrichment and

214 boiled at 95°C for 30 mins to kill and lyse the bacteria. Freeze dried LAMP reactions,  
215 containing *wzy-1* primers, were reconstituted with betaine solution (0.8 M betaine  
216 final concentration) and 1 µl of the enriched cultures diluted 15-fold in water added  
217 before incubating at 63°C for 50 minutes. The amplification reactions were examined  
218 by electrophoresis (Fig 5A) and by the addition of a flocculation solution [20] (Fig  
219 5B). No amplification was detected in the water controls or the non-inoculated  
220 samples however, a strong amplification was observed in the *E. coli* O157:H7  
221 inoculated sample (Fig 5A). The addition of flocculation solution mirrored the results  
222 observed on the agarose gel that is, *E. coli* inoculated samples gave a positive  
223 flocculation result in which the particles in solution clumped together and rapidly  
224 settled to the bottom of the tube and leaving a transparent liquid phase (Fig 5B). In  
225 contrast, the water controls and the non-inoculated samples showed a negative  
226 flocculation reaction in which the black particles remained suspended.

227

228

229 **Figure 4. Overview of the complete food pathogen detection system.** Sample  
230 maceration and enrichment involves shaking fresh produce samples in a tube  
231 containing growth media and ball bearings to macerate the tissue and release  
232 contaminating pathogens followed by an overnight incubation at 41.5°C. Pathogen  
233 cell lysis and DNA release is achieved by incubating the enriched sample at 95°C for

234 30 minutes. LAMP DNA amplification is performed on a diluted sample of the  
235 overnight culture by incubating the reaction in a water bath using a Styrofoam box  
236 containing 63°C water. The results of the DNA amplification are visualized by adding  
237 flocculation solution. In the absence of amplification the solution will remain black  
238 and non-transparent (upper tube), alternatively if the pathogen is detected, the  
239 particles in the solution will flocculate and rapidly settle on the bottom of the tube  
240 (lower tube).

241

242

243

244

245 **Figure 5. Evaluation of the complete *E. coli* O157:H7 diagnostic system. (A)**

246 Freeze dried LAMP reactions containing the *wzy-1* primer set were rehydrated in  
247 betaine solution and 1 µl of diluted enriched culture from Brussel sprout leaf samples  
248 inoculated with *E. coli* O157:H7. Non-inoculated leaf cultures were used as negative  
249 controls as well as water (NTC). (B) 20 µl of flocculation solution was added to the  
250 above LAMP reactions and the solutions mixed for 10-15 seconds. Settling of the  
251 particles indicates a positive reaction. (C) Fresh produce was collected from three  
252 farms and three markets in Cambodia. Samples were assayed for the presence *wzy*  
253 using the developed diagnostic workflow. Data shows the percentage of positive

254 samples (bar graphs) as well as the number of positive and total number of samples  
255 from each sampling site (numbers above each bar).

256

257

258 To assess the workflow in field conditions we transported enough reactions to test  
259 100 vegetable samples to Cambodia with the *wzy-1* primer set. Cauliflower, radish  
260 and bean leaves, as well as bean pods were collected from three different  
261 Cambodian farms (S2 Fig) located within an approximate 10km radius of each other.  
262 Tissues were processed following the above described workflow (Fig. 4) and positive  
263 tests were obtained at all sites. In total, 25%, 39% and 26% of samples tested  
264 positive for *wzy* on farms #1, #2 and #3, respectively.

265

266 We also collected samples from three different outlets: a roadside vegetable stall  
267 and two large food markets located in a rural area (Figs S3A and S3B) and within the  
268 city Phnom Penh (Figs S3C and S3D). The roadside vegetable stall (market #1) was  
269 located along a dirt road that was used by local farmers and villagers as well as their  
270 farm animals. We found that 56% of the samples obtained from this stall tested  
271 positive (Fig 5C, Market #1). Market #2 was located in a small rural village and had a  
272 hard packed dirt floor containing numerous puddles of liquid and a low tin roof that  
273 protected the produce from direct sun exposure but generated an intense heat with

274 little air flow (market #2, Figs S3A and S3B). Raw meat products were not  
275 refrigerated and were allowed to come in direct contact with fresh produce (Fig S3B)  
276 in closely packed stalls where a large number of flies freely moved between the meat  
277 and fresh produce. A high proportion (45%) of the samples collected from this  
278 market tested positive for *wzy* (Fig 5C). In contrast, the market located within the city  
279 (Phnom Penh) (market #3, Figs S3C and S3D) had significantly better ventilation  
280 than the rural market and a large proportion of the floor was concreted and appeared  
281 clean. The vegetables in this market looked fresh and not wilted like in the rural  
282 market. Only one out of 16 samples (6%) from this market tested positive using the  
283 *wzy* primer set (Fig 5C, Market #3).

284

## 285 **Discussion**

286 The goal of this study was to develop a complete diagnostic workflow for food  
287 pathogens tailored to countries with limited resources to enhance food biosecurity  
288 capability. Our focus was to create a robust, simple and low-cost system that is safe  
289 to perform by people with limited training and equipment. The successful testing of  
290 our system in Cambodia on samples collected from the local farms and markets,  
291 suggests that we have developed a practical system that meets these requirements  
292 and is capable of providing meaningful data that can support food safety initiatives.

293

294 Culture-based techniques are the most reliable method for food pathogen  
295 identification however, these techniques are slow and require highly skilled  
296 technicians to perform [33]. The diagnostic workflow presented here is simpler and  
297 faster allowing large numbers of samples to be screened in situations where access  
298 to suitably trained microbiologists is limited. Our diagnostic workflow takes  
299 advantage of the many desirable characteristics of LAMP amplification, including  
300 high specificity and the ability to be performed in a simple water bath [34, 35].  
301 However, like all DNA amplification reactions, LAMP is not immune to issues of  
302 contamination or false-positive amplifications [36]. Thus, it is critically important to  
303 optimize sample processing to prevent cross-contamination and develop robust  
304 specific primer sets for each target organisms prior to deployment.

305

306 The diagnostic workflow developed here can be easily adapted to detect the  
307 presence of target genes from different food pathogens using highly specific LAMP  
308 primer sets readily available in the literature [37-39]. Unlike specificity, the sensitivity  
309 of the primers is less critical to the success of the assay as the overnight enrichment  
310 step significantly increases the pathogen levels in the tested sample. Consistent  
311 with this, our assay has successfully detected the presence of 1 CFU of *E. coli* O157  
312 on a 1 g sample of Alfalfa sprouts (Fig 2B) emphasizing that the simplicity of the



313 detection workflow presented here does not limit its capacity to detect trace amounts  
314 of pathogens on produce.

315

316 The focus of our investigation in Cambodia was to examine the performance of our  
317 workflow rather than perform a comprehensive survey of Cambodian produce. Thus,  
318 we purposely biased the sampling by seeking out produce with increased likelihood  
319 of *E. coli* contamination such as containing mud splashes or selecting farms with free  
320 roaming animals [10, 23, 40, 41]. The data obtained in this study revealed a clear  
321 correlation between the origin and condition of the produce and the likelihood of  
322 contamination. For example, the location of the food stall (market #1) on a dirt road  
323 used by local villagers and their farm animals allowed dirt from the road, potentially  
324 carrying zoonotic diseases from animal waste, to blow over the stall increasing the  
325 risk of contamination (Fig 5C) [42, 43]. Similarly, the poor drainage, problems with  
326 flies and lack of separation between raw meat and fresh produce by some vendors in  
327 market #2 also increased the risk of zoonotic disease contamination in fresh  
328 produce. Therefore, it is not surprising that these rural locations (market #1 and #2)  
329 accounted for 95% of the *wzy*-positive market samples. Consistent with this, other  
330 studies that have shown a strong correlation between food-borne disease infections  
331 and the selling of produce in markets where the vendors do not follow safe food  
332 handling practices or lack access to essential facilities (e.g. clean water, garbage

333 removal) [3, 42]. Furthermore, a study by the World Health Organization of ‘Morning  
334 glory’ produce harvested from areas surrounding Phnom Penh, found that 100% of  
335 samples collected in Cambodian markets were contaminated with *E. coli* species  
336 [44]. Collectively, these findings suggest that there is a real need for simple, low-cost  
337 diagnostic systems to help the local authorities to improve food safety.

338

339 All the surveyed farms had a similar proportion (25-38%) of produce that tested  
340 positive for *wzy* (Fig 5C). As the farms were located within a 10 km radius of each  
341 other, these findings suggest that they are exposed to similar levels of pathogenic  
342 bacteria through common water supplies [40] or airborne particulates that can move  
343 between farms [45]. In this proof-of-concept study, we demonstrate that our simple  
344 workflow is capable of obtaining meaningful data on the prevalence of harmful food  
345 pathogens in specific locations; such information is critical to improve regional food  
346 safety.

347

348 There are many diagnostic systems for food pathogens described in the scientific  
349 literature or commercially available. However, our diagnostic workflow has a number  
350 of advantages over many of the available systems. Compared to some commercially  
351 available diagnostic systems (e.g. lateral flow strips (\$6.80 USD each, Romer labs))  
352 or systems that involve disposable electronics or custom-made microfluidic parts [46,

353 47]; our diagnostic system is considerably more affordable; costing \$0.76 USD,  
354 including all tubes and reagents (S2 Table), which can be further reduced to \$0.53  
355 USD if the ball bearings and 50ml tubes are carefully decontaminated and reused.  
356 Cost is a critical factor for developing countries with very limited budgets devoted to  
357 food safety. Lowering the cost of assays will allow increased testing and thereby  
358 boosting its efficiency as a biosecurity tool [48].

359

360 The use of LAMP, an isothermal amplification method, allowed us to avoid the  
361 expensive thermocyclers needed in conventional DNA amplification techniques such  
362 as real-time PCR, substituting it with a simple Styrofoam box. Water was easily  
363 adjusted to the desired temperature (63°C) by mixing hot and cold water and using a  
364 standard thermometer. A lid was placed on top of the Styrofoam box to keep the  
365 water close to the initial temperature for the time needed to perform the reaction.  
366 Using this system, the water temperature dropped only 3°C over the 50-minute  
367 incubation period. This easily accessible and low-tech approach eliminates the need  
368 for expensive scientific equipment for DNA amplification, and with well-designed  
369 LAMP primers, can provide accurate detection of pathogens from food samples [21,  
370 49].

371

372 The flocculation-based readout used in our workflow is cheap and does not require  
373 any specialized equipment, unlike conventional techniques like agarose gel  
374 electrophoresis or modern microfluidic or electronic-based systems. The flocculation  
375 solution causes the large DNA amplicons produced in the LAMP reaction to bind to  
376 suspended black charcoal particles, forming large clumps that rapidly drop to the  
377 bottom of the tube leaving a clear upper phase that is easy to distinguish from the  
378 black, non-transparent negative reactions [20]. The simplicity of the flocculation  
379 assay enables people with limited scientific training to perform and interpret the  
380 assay.

381

382 The ability to perform sample maceration, enrichment and DNA extraction in a single  
383 tube without needing to open it between steps makes processing the samples simple  
384 and safe and allows the user to handle a large number of samples at once. This  
385 process could be made even simpler by using the newly developed 30 second  
386 dipstick-based DNA purification technology [50] circumventing the need for any  
387 pipetting. Unfortunately, the rapid dipstick purification method was developed after  
388 the completion of this study.

389

390 In summary, we have developed a complete food pathogen diagnostic system  
391 composed of four key steps: pathogen enrichment, cell lysis/DNA release, LAMP

392 amplification, and naked eye readout (Fig 4). The minimal number of steps and  
393 equipment involved, as well as the simplicity of the presence/absence flocculation  
394 readout, allows almost anyone, including those with limited scientific training, to  
395 perform the assay. Furthermore, the low cost of the system (\$0.76 USD) and broad  
396 availability of its reagents, makes the system accessible to countries or institutions  
397 with limited resources who might not otherwise be able to afford regular food testing.  
398 Every step in the diagnostic workflow has been designed with the World Health  
399 Organization's ASSURED philosophy in mind, that is, Affordable, Sensitive, Specific,  
400 User-friendly, Rapid, Equipment-free, and Deliverable to those who need it [51]. As  
401 the system is based on DNA amplification using specific primers, our diagnostic  
402 system can be easily modified to identify a large variety of pathogens including those  
403 that infect humans, crops or animals. Therefore, we anticipate that the incorporation  
404 of our diagnostic system into food safety programs of developing countries will  
405 facilitate improvements to both their food quality and human health.

406

## 407 **Methods**

### 408 **Bacterial strains**

409 *Escherichia coli* O157:H7 str. EDL933 and *Salmonella enterica* serovar *enteritidis*

410 were used to develop and test the diagnostic assay.

411

## 412 **Primer selection.**

413 A number of potential *E. coli* O157:H7 target genes were selected for primer  
414 development including the shiga toxin genes *stx1* and *stx2*, the O-antigen  
415 polymerase *wzy*, the O-antigen transporter, and *rfbE*, the H7 flagellar antigen *FliC*  
416 (S1 Table). A CLUSTALW alignment was performed for each of each of these genes  
417 using *E. coli* O157:H7 sequences found on the Genbank database. These  
418 alignments were used to design LAMP primer against conserved regions of these  
419 target genes using Primer Explorer software V4 (<http://primerexplorer.jp/e/>).

420

## 421 **LAMP DNA amplification**

422 Unless otherwise stated, LAMP reactions were performed by in a solution containing  
423 20 mM Tris (pH 8.8), 10 mM (NH<sub>4</sub>)<sub>2</sub>SO<sub>4</sub>, 50 mM KCl, 0.1% (v/v) Tween-20, 0.8 M  
424 betaine, 8 mM MgSO<sub>4</sub>, 1.2 mM dNTPs, 0.32 U/μl Bst2.0 warm-start (NEB Biolabs,  
425 USA), 0.8 μM of FIP and BIP primers and 0.2 μM of F3 and B3 primers. Reactions  
426 were incubated at 63°C for 50 minutes followed by a five-minute incubation at 80°C  
427 to denature the enzyme.

428

## 429 **Flocculation solution preparation**

430 The final, optimized flocculation solution is made from 100-400 mesh activated  
431 charcoal (Sigma, St. Louis, USA) and powdered diatomaceous earth that had been  
432 ground separately in a coffee grinder for 45 seconds to break up any large particles.  
433 400mg of activated charcoal and 600mg of diatomaceous earth were combined in a  
434 50 ml solution containing 50 mM Tris (pH 8), 10 mM spermine and 1% (w/v)  
435 PEG8000. The flocculation solution can either be stored at 4°C or -20°C for at least a  
436 year without loss of activity.

437

## 438 **Freeze drying method**

439 The buffer of Bst 2.0 warm-start DNA polymerase (NEB) was replaced with  
440 Isothermal amplification buffer (NEB) by centrifugation of the enzyme in an Amicon  
441 Ultracel-30 centrifugal filter device (Merck-Milipore) and subsequently washing in  
442 Isothermal amplification buffer twice. Aliquot 3.49 µl of LAMP solution (1.1 U/µl of  
443 dialyzed Bst 2.0 warm-start polymerase, 50 mM Tris (pH 8.8), 25 mM (NH<sub>4</sub>)<sub>2</sub>SO<sub>4</sub>, 25  
444 mM KCl, 20 mM MgSO<sub>4</sub>, 0.25% (v/v) Triton x100, 3.4 mM dNTPs, 4.6 µM FIP and  
445 BIP primers, 0.6 µM B3 and F3 primers, 5% (w/v) Trehalose) into individual 0.2 ml  
446 tubes. The solutions were frozen in liquid nitrogen and then immediately transferred  
447 to a freeze drier for at least 4 hours under a vacuum of below 150 mTorr.

448

## 449 **Vegetable sample collection**

450 In May, 2015, vegetable samples were collected from three Cambodian farms and  
451 four markets either in or surrounding Phnom Penh. The markets included a small  
452 rural village roadside vegetable stall, two large markets in the outskirts of Phnom  
453 Penh and one market within the city. Vegetables collected included cauliflower  
454 leaves, beans, sprouts, lettuce and other leafy herbs. Vegetable samples were  
455 immediately placed in individual plastic bags that were labelled and stored on ice  
456 until they were processed using the complete food pathogen diagnostic system  
457 detailed below. Access to farms was arranged by the Cambodian General  
458 Directorate of Agriculture (GDA) who obtained verbal approval from the landowners  
459 for us to collect plant samples. No protected species were samples in this study.

460

## 461 **Complete food pathogen diagnostic system**

462 Approximately 1g of vegetable leaf material was placed in a 50 ml tube containing  
463 three ball bearings and 10 ml of buffered peptone growth media. The buffered  
464 peptone media was pre-aliquoted powder and made up with boiled water  
465 immediately prior to use. The tube containing the vegetable sample was sealed with  
466 Parafilm M (Bemis, WI, USA) and then shaken vigorously for one minute to aid the  
467 release of any food pathogens from the tissue. The samples were incubated  
468 overnight at 41.5°C overnight to enrich the bacteria present and then boiled for 30



469 minutes to both kill any bacteria present and to release their DNA into the media.  
470 One microliter of culture that had been diluted 15-fold with water was added to a  
471 freeze-dried LAMP reaction that had been rehydrate with 9  $\mu$ l 0.89M betaine. The  
472 reaction was incubated in a lidded Styrofoam box containing 63°C water for 50  
473 minutes. 20  $\mu$ l of flocculation solution (50 mM Tris (pH 8), 10 mM spermine, 1%  
474 (w/v) PEG 8000, 0.8% (w/v) powdered activated charcoal, 1.2% (w/v) powdered  
475 diatomaceous earth) was then added to each LAMP reaction and the tube gently  
476 flicked to encourage mixing of the solutions. Samples in which the particles  
477 flocculated and settled on the bottom of the tube within 20 seconds were called  
478 positive, whereas those in which the particles remained suspended were negative.

479

## 480 **Acknowledgements**

481 We would like to thank the many people from the General Directorate of Agriculture  
482 (GDA) in Cambodia who provided us with invaluable assistance by guiding us to  
483 different farms and markets in and around Phnom Penh. We would also like to thank  
484 Australian Centre for International Agricultural Research (ACIAR) for funding this  
485 research.

486

487

## 488 **Funding**

489 This work was supported by the Australian Centre for International Agricultural  
490 Research (ACIAR) HORT/2014/027.

491

492

## 493 **References**

494 1. Oliver SP, Jayarao BM, Almeida RA. Foodborne pathogens in milk and the  
495 dairy farm environment: Food safety and public health implications. Foodborne  
496 Pathog Dis. 2005; 2:115-129. doi: 10.1089/fpd.2005.2.115.

497 2. WHO estimates of the global burden of foodborne diseases: Foodborne  
498 diseases burden epidemiology reference group 2007-2015. World Health  
499 Organization. 2015. Available from:

500 [https://www.who.int/foodsafety/publications/foodborne\\_disease/fergreport/en/](https://www.who.int/foodsafety/publications/foodborne_disease/fergreport/en/).

501 3. Grace D. Food Safety in Low and Middle Income Countries. Int J Env Res  
502 Public Health. 2015; 12:10490-10507.

503 4. Annual Health Statistics Report, 2012. Ministry of Health. 2012. Available  
504 from: [https://www.who.int/gho/publications/world\\_health\\_statistics/2012/en/](https://www.who.int/gho/publications/world_health_statistics/2012/en/).

505 5. Meng CY, Smith BL, Bodhidatta L, Richard SA, Vansith K, Ban T, et al.  
506 Etiology of Diarrhea in Young Children and Patterns of Antibiotic Resistance in  
507 Cambodia. Pediatr Infect Dis J. 2011; 30:331-335. doi:  
508 10.1097/INF.0b013e3181fb6f82.

- 509 6. Saeedi P, Yazdanparast M, Behzadi E, Salmanian AH, Mousavi SL, Nazarian  
510 S, et al. A review on strategies for decreasing *E-coli O157:H7* risk in animals. *Microb*  
511 *Pathog.* 2017; 103:186-195. doi: 10.1016/j.micpath.2017.01.001.
- 512 7. Wang F, Jiang L, Yang QR, Prinyawiwatkul W, Ge BL. Rapid and Specific  
513 Detection of *Escherichia coli* Serogroups O26, O45, O103, O111, O121, O145, and  
514 O157 in Ground Beef, Beef Trim, and Produce by Loop-Mediated Isothermal  
515 Amplification. *Appl Environ Microbiol.* 2012; 78:2727-2736.
- 516 8. Yang SC, Lin CH, Aljuffali IA, Fang JY. Current pathogenic *Escherichia coli*  
517 foodborne outbreak cases and therapy development. *Arch Microbiol.* 2017; 199:811-  
518 825. doi: 10.1007/s00203-017-1393-y.
- 519 9. Croxen MA, Finlay BB. Molecular mechanisms of *Escherichia coli*  
520 pathogenicity. *Nat Rev Microbiol.* 2010; 8:26-38. doi: 10.1038/nrmicro2265.
- 521 10. Bavaro MF. *E. coli O157:H7* and other toxigenic strains: the curse of global  
522 food distribution. *Curr Gastroenterol Rep.* 2012; 14:317-323. doi: 10.1007/s11894-  
523 012-0264-6.
- 524 11. Hilborn ED, Mermin JH, Mshar PA, Hadler JL, Voetsch A, Wojtkunski C, et al.  
525 A multistate outbreak of *Escherichia coli O157 : H7* infections associated with  
526 consumption of mesclun lettuce. *Arch Intern Med.* 1999; 159:1758-1764. doi: DOI  
527 10.1001/archinte.159.15.1758.
- 528 12. Vojdani JD, Beuchat LR, Tauxe RV. Juice-associated outbreaks of human  
529 illness in the United States, 1995 through 2005. *J Food Prot.* 2008; 71:356-364.
- 530 13. Jajarmi M, Fooladi AAI, Badouei MA, Ahmadi A. Virulence genes, Shiga toxin  
531 subtypes, major O-serogroups, and phylogenetic background of Shiga toxin-  
532 producing *Escherichia coli* strains isolated from cattle in Iran. *Microb Pathog.* 2017;  
533 109:274-279. doi: 10.1016/j.micpath.2017.05.041.

- 534 14. Keene WE, Mcanulty JM, Hoesly FC, Williams LP, Hedberg K, Oxman GL, et  
535 al. A Swimming-Associated Outbreak of Hemorrhagic Colitis Caused by *Escherichia-*  
536 *Coli O157-H7* and *Shigella-Sonnei*. New England Journal of Medicine. 1994;  
537 331:579-584.
- 538 15. FSANZ Compendium of Microbiological Criteria for Food. 2018. Available  
539 from:  
540 [https://www.foodstandards.gov.au/publications/Documents/Compendium%20of%20Mi](https://www.foodstandards.gov.au/publications/Documents/Compendium%20of%20Microbiological%20Criteria/Compendium_revised-jan-2018.pdf)  
541 [crobiological%20Criteria/Compendium\\_revised-jan-2018.pdf](https://www.foodstandards.gov.au/publications/Documents/Compendium_revised-jan-2018.pdf).
- 542 16. Feng P, Weagant SD, Grant MA, Burkhardt W. Chapter 4A Enumeration of  
543 *Escherichia coli* and the Coliform Bacteria Bacteriological Analytical Manual: US  
544 Food and Drug Administration; 2002 [cited 2017 27-10-2017]. Available from:  
545 [https://www.fda.gov/Food/FoodScienceResearch/LaboratoryMethods/ucm064948.ht](https://www.fda.gov/Food/FoodScienceResearch/LaboratoryMethods/ucm064948.htm)  
546 [m](https://www.fda.gov/Food/FoodScienceResearch/LaboratoryMethods/ucm064948.htm).
- 547 17. Law JWF, Ab Mutalib NS, Chan KG, Lee LH. Rapid methods for the detection  
548 of foodborne bacterial pathogens: principles, applications, advantages and  
549 limitations. Front Microbiol. 2015; 5.
- 550 18. Barany F. The ligase chain reaction in a PCR world. PCR Methods Appl.  
551 1991; 1:5-16.
- 552 19. Notomi T, Okayama H, Masubuchi H, Yonekawa T, Watanabe K, Amino N, et  
553 al. Loop-mediated isothermal amplification of DNA. Nucleic Acids Res. 2000; 28:e63-  
554 e63.
- 555 20. Mason MG, Botella JR. A simple, robust and equipment-free DNA  
556 amplification readout in less than 30 seconds. RSC Adv. 2019; 9:24440-24450. doi:  
557 10.1039/C9RA04725E.

- 558 21. Hara-Kudo Y, Konishi N, Ohtsuka K, Hirramatsu R, Tanaka H, Konuma H, et  
559 al. Detection of Verotoxigenic *Escherichia coli* O157 and O26 in food by plating  
560 methods and LAMP method: A collaborative study. Int J Food Microbiol. 2008;  
561 122:156-161.
- 562 22. Tuttle J, Gomez T, Doyle MP, Wells JG, Zhao T, Tauxe RV, et al. Lessons  
563 from a large outbreak of *Escherichia coli* O157 : H7 infections: insights into the  
564 infectious dose and method of widespread contamination of hamburger patties.  
565 Epidemiology and Infection. 1999; 122:185-192.
- 566 23. Smith JL, Fratamico PM, Gunther NW. Shiga Toxin-Producing *Escherichia*  
567 *coli*. Adv Appl Microbiol. 2014; 86:145-197.
- 568 24. DebRoy C, Roberts E, Kundrat J, Davis MA, Briggs CE, Fratamico PM.  
569 Detection of *Escherichia coli* serogroups O26 and O113 by PCR amplification of the  
570 wzx and wzy genes. Appl Environ Microbiol. 2004; 70:1830-1832. doi:  
571 10.1128/aem.70.3.1830-1832.2004.
- 572 25. Iguchi A, Iyoda S, Seto K, Nishii H, Ohnishi M, Mekata H, et al. Six Novel O  
573 Genotypes from Shiga Toxin-Producing *Escherichia coli*. Front Microbiol. 2016; 7.  
574 doi: 10.3389/fmicb.2016.00765.
- 575 26. Goji N, Mathews A, Huszczyński G, Laing CR, Gannon VPJ, Graham MR, et  
576 al. A new pyrosequencing assay for rapid detection and genotyping of Shiga toxin,  
577 intimin and O157-specific rfbE genes of *Escherichia coli*. J Microbiol Methods. 2015;  
578 109:167-179. doi: 10.1016/j.mimet.2014.12.003.
- 579 27. Wang L, Rothmund D, Curd H, Reeves PR. Sequence diversity of the  
580 *Escherichia coli* H7 fliC genes: Implication for a DNA-based typing scheme for *E. coli*  
581 O157 : H7. J Clin Microbiol. 2000; 38:1786-1790.

- 582 28. Karberg KA, Olsen GJ, Davis JJ. Similarity of genes horizontally acquired by  
583 *Escherichia coli* and *Salmonella enterica* is evidence of a supraspecies pangenome.  
584 Proc Natl Acad Sci U S A. 2011; 108:20154-20159.
- 585 29. Abou Tayoun AN, Burchard PR, Malik I, Scherer A, Tsongalis GJ.  
586 Democratizing Molecular Diagnostics for the Developing World. Am J Clin Pathol.  
587 2014; 141:17-24. doi: 10.1309/Ajcpa114kpxbjnpg.
- 588 30. Ahmed SS, Alp E, Ulu-Kilic A, Doganay M. Establishing molecular  
589 microbiology facilities in developing countries. J Infect Public Heal. 2015; 8:513-525.  
590 doi: 10.1016/j.jiph.2015.04.029.
- 591 31. Lippert K, Galinski EA. Enzyme Stabilization by Ectoine-Type Compatible  
592 Solutes - Protection against Heating, Freezing and Drying. Applied Microbiology and  
593 Biotechnology. 1992; 37:61-65.
- 594 32. Klatser PR, Kuijper S, van Ingen CW, Kolk AHJ. Stabilized, freeze-dried PCR  
595 mix for detection of mycobacteria. J Clin Microbiol. 1998; 36:1798-1800.
- 596 33. Priyanka B, Patil RK, Dwarakanath S. A review on detection methods used for  
597 foodborne pathogens. Indian J Med Res. 2016; 144:327-338. doi: 10.4103/0971-  
598 5916.198677.
- 599 34. Wang X, Seo DJ, Lee MH, Choi C. Comparison of Conventional PCR,  
600 Multiplex PCR, and Loop-Mediated Isothermal Amplification Assays for Rapid  
601 Detection of *Arcobacter* Species. J Clin Microbiol. 2014; 52:557-563. doi:  
602 10.1128/Jcm.02883-13.
- 603 35. Khan M, Wang R, Li B, Liu P, Weng Q, Chen Q. Comparative Evaluation of  
604 the LAMP Assay and PCR-Based Assays for the Rapid Detection of *Alternaria*  
605 *solani*. Front Microbiol. 2018; 9:2089. doi: 10.3389/fmicb.2018.02089.

- 606 36. Borst A, Box ATA, Fluit AC. False-positive results and contamination in  
607 nucleic acid amplification assays: Suggestions for a prevent and destroy strategy.  
608 Eur J Clin Microbiol Infect Dis. 2004; 23:289-299. doi: 10.1007/s10096-004-1100-1.
- 609 37. Mahony J, Chong S, Stone C, Chui L. Evaluation of Four Loop-Mediated  
610 Isothermal Amplification (LAMP) Assays for Identification of Shiga Toxin Producing  
611 *E.Coli O157* (STEC) and Non-O157 Strains. Adv Mol Diag. 2016; 1:104. doi:  
612 10.4172/amd.1000104.
- 613 38. Wang F, Yang QR, Qu YZ, Meng JH, Ge BL. Evaluation of a Loop-Mediated  
614 Isothermal Amplification Suite for the Rapid, Reliable, and Robust Detection of Shiga  
615 Toxin-Producing *Escherichia coli* in Produce. Appl Environ Microbiol. 2014; 80:2516-  
616 2525. doi: 10.1128/Aem.04203-13.
- 617 39. Domesle KJ, Yang Q, Hammack TS, Ge B. Validation of a Salmonella loop-  
618 mediated isothermal amplification assay in animal food. Int J Food Microbiol. 2018;  
619 264:63-76. doi: 10.1016/j.ijfoodmicro.2017.10.020.
- 620 40. Chekabab SM, Paquin-Veillette J, Dozois CM, Harel J. The ecological habitat  
621 and transmission of *Escherichia coli O157:H7*. FEMS Microbiol Lett. 2013; 341:1-12.
- 622 41. Janisiewicz WJ, Conway WS, Brown MW, Sapers GM, Fratamico P,  
623 Buchanan RL. Fate of *Escherichia coli O157:H7* on fresh-cut apple tissue and its  
624 potential for transmission by fruit flies. Appl Environ Microbiol. 1999; 65:1-5.
- 625 42. Rane S. Street Vended Food in Developing World: Hazard Analyses. Indian J  
626 Microbiol. 2011; 51:100-106.
- 627 43. Muyanja C, Nayiga L, Brenda N, Nasinyama G. Practices, knowledge and risk  
628 factors of street food vendors in Uganda. Food Control. 2011; 22:1551-1558.

- 629 44. Microbiological Hazards in Fresh Leafy Vegetables and Herbs: Meeting  
630 Report 2008. 2008. Available from:  
631 [https://www.who.int/foodsafety/publications/mra\\_14/en/](https://www.who.int/foodsafety/publications/mra_14/en/).
- 632 45. Berry ED, Wells JE, Bono JL, Woodbury BL, Kalchayanand N, Norman KN, et  
633 al. Effect of proximity to a cattle feedlot on *Escherichia coli* O157:H7 contamination  
634 of leafy greens and evaluation of the potential for airborne transmission. Appl  
635 Environ Microbiol. 2015; 81:1101-1110. doi: 10.1128/AEM.02998-14.
- 636 46. Jiang YQ, Zou S, Cao XD. A simple dendrimer-aptamer based microfluidic  
637 platform for *E. coli* O157:H7 detection and signal intensification by rolling circle  
638 amplification. Sensor Actuat B-Chem. 2017; 251:976-984. doi:  
639 10.1016/j.snb.2017.05.146.
- 640 47. Wang T, Kim S, An JH. A novel CMOS image sensor system for quantitative  
641 loop-mediated isothermal amplification assays to detect food-borne pathogens. J  
642 Microbiol Methods. 2017; 133:1-7.
- 643 48. McNerney R. Diagnostics for Developing Countries. Diagnostics. 2015; 5:200-  
644 209.
- 645 49. Wang F, Jiang L, Ge BL. Loop-Mediated Isothermal Amplification Assays for  
646 Detecting Shiga Toxin-Producing *Escherichia coli* in Ground Beef and Human  
647 Stools. J Clin Microbiol. 2012; 50:91-97.
- 648 50. Zou Y, Mason MG, Wang Y, Wee E, Turni C, Blackall PJ, et al. Nucleic acid  
649 purification from plants, animals and microbes in under 30 seconds. PLoS Biol.  
650 2017; 15:e2003916. doi: 10.1371/journal.pbio.2003916.
- 651 51. Kettler H, White K, Hawkes S. Mapping the landscape of diagnostics for  
652 sexually transmitted infections. World Health Organization on behalf of the Special



653 Programme for Research and Training in Tropical Diseases 2004. Available from:

654 <https://apps.who.int/iris/handle/10665/68990>.

655

656

## 657 **Supporting information captions**

658

659 **S1 Figure. Optimization of Pathogen DNA extraction.** (A) Image shows tissue

660 that has been macerated after shaking in a 50 mL tube containing 10 ml of buffered

661 peptone water and four ball bearings. (B) LAMP amplification products obtained

662 using *stx2-1* primer set and template consisting of either 1, 2 or 4 µl of undiluted

663 enriched culture or 1 or 2 µl of culture diluted 25-fold in water.

664

665 **S2 Figure. Images of Cambodian farms collection sites.** (A) Collection of

666 cauliflower leaves in individual plastic bags at farm #1. (B) Image of farm #2 which

667 was a small plot in with cauliflower grown in the foreground and beans growing in the

668 background. (C) Image of a cow that freely roamed amongst the cauliflower crop at

669 farm #1.

670

671 **S3 Figure. Images of Cambodian market collection sites.** (A) Image of the

672 cramped conditions in the rural market #2. (B) Image of some of the meat and

673 produce being sold side by side at market #2. (C) Image of a large city market in  
674 Phenom Penh (market #3) with material covered tents and less cramped conditions  
675 compared to the rural market. (D) Separation of meat and fresh produce at market  
676 #3.

677

678 **S1 Table. LAMP primer sequences used in this study**

679

680 **S2 Table. Costings of individual components of the food pathogen assay.**

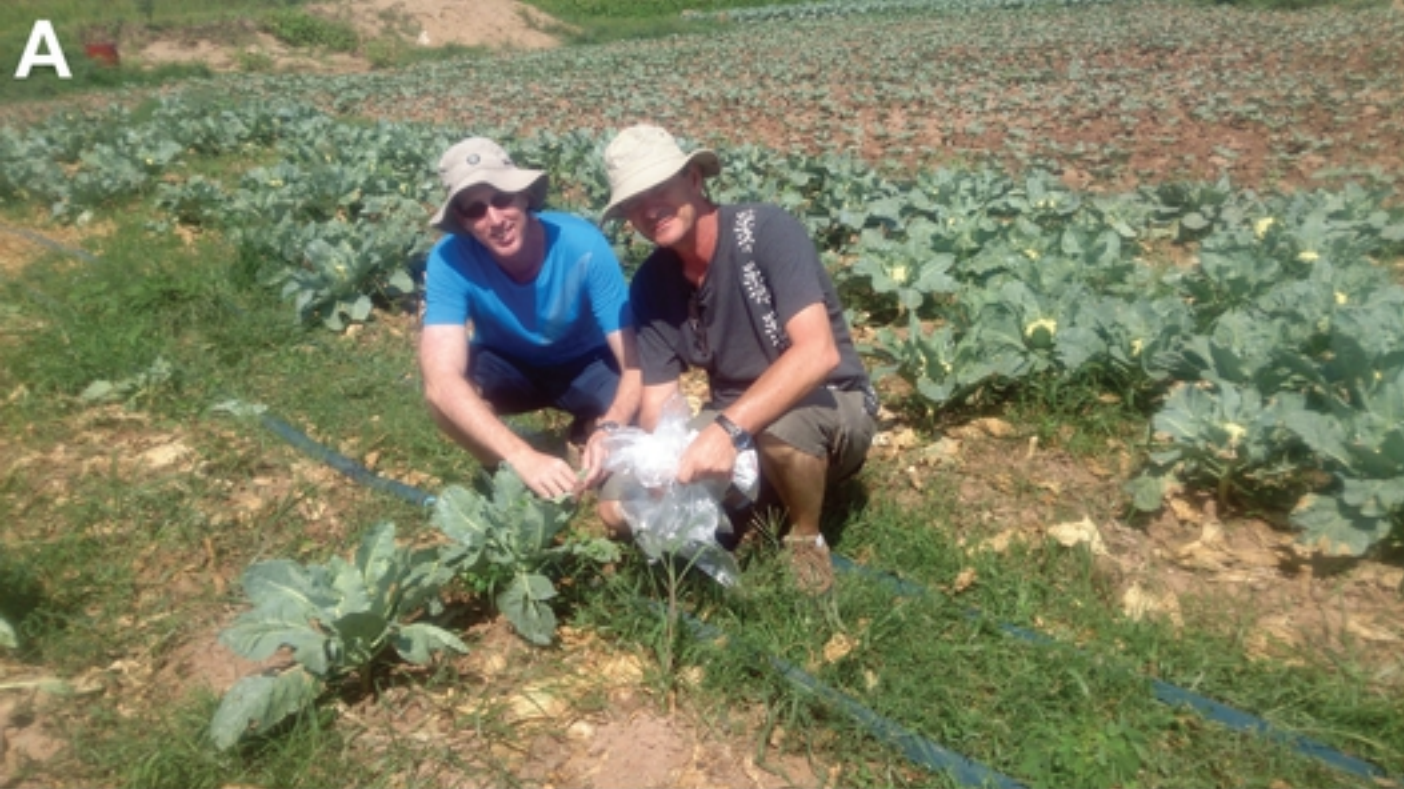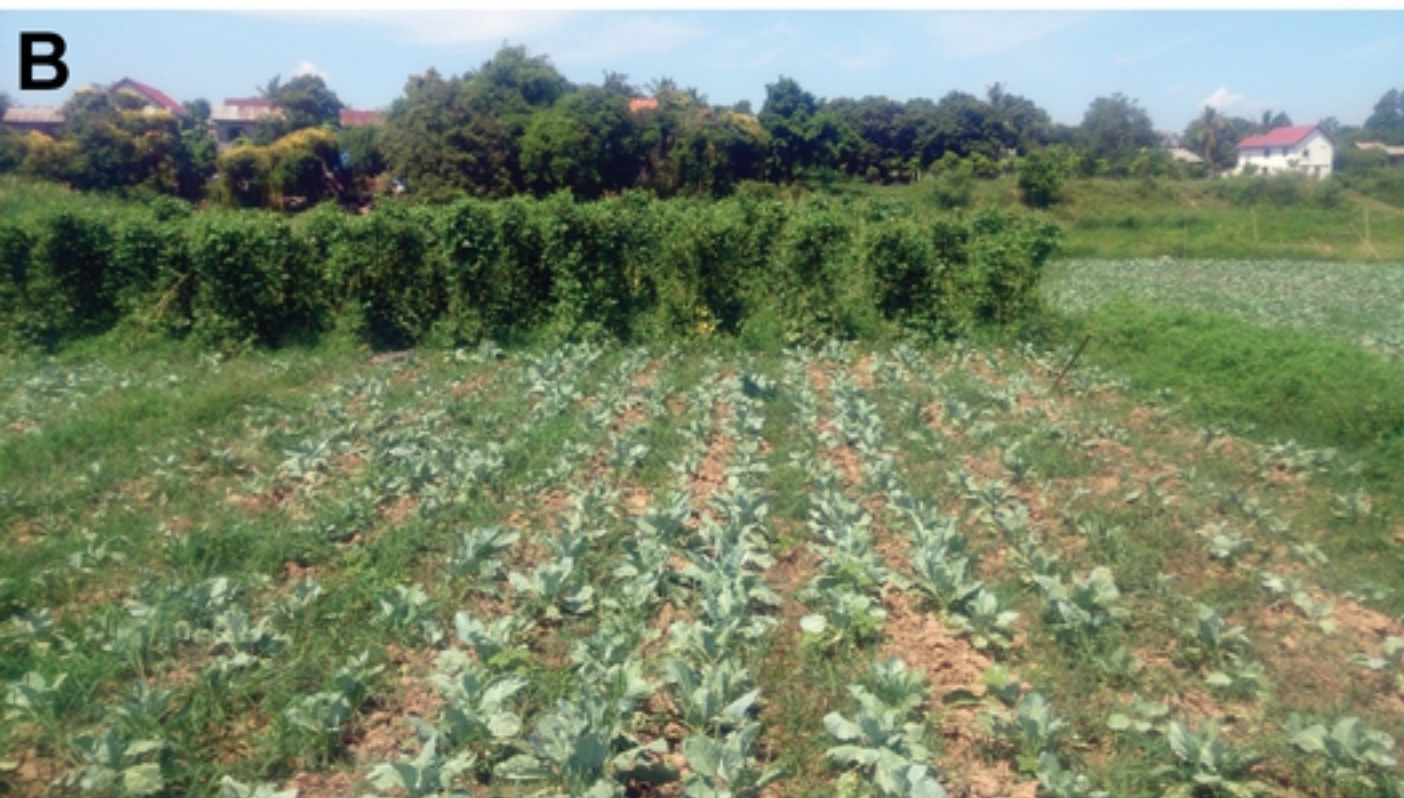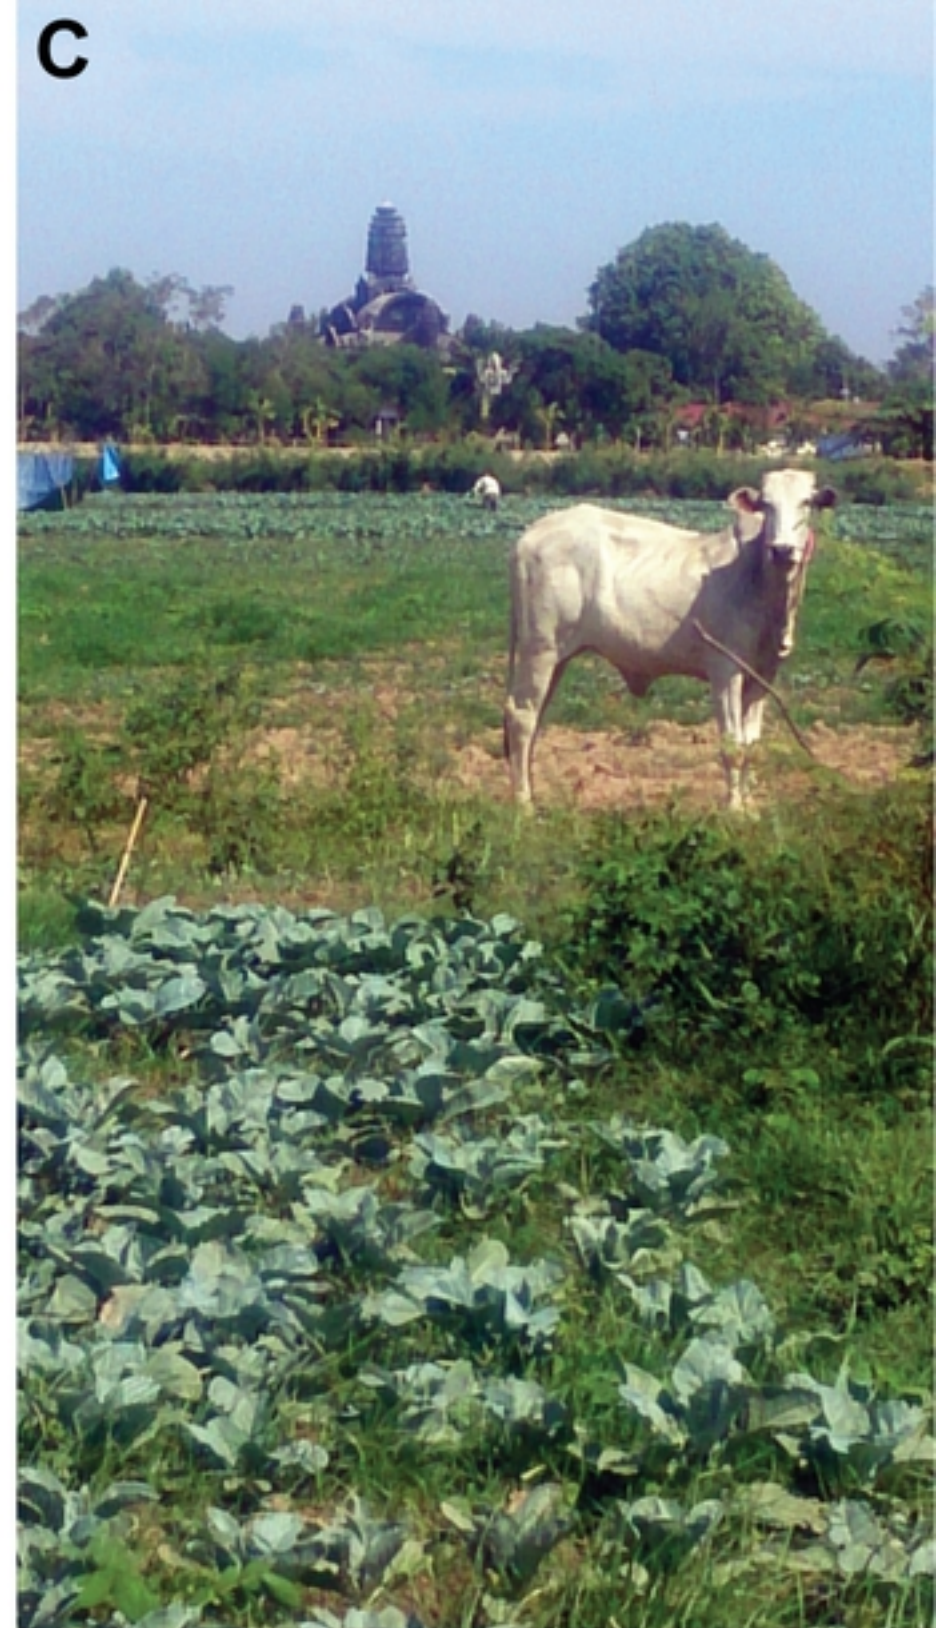

S2 Figure

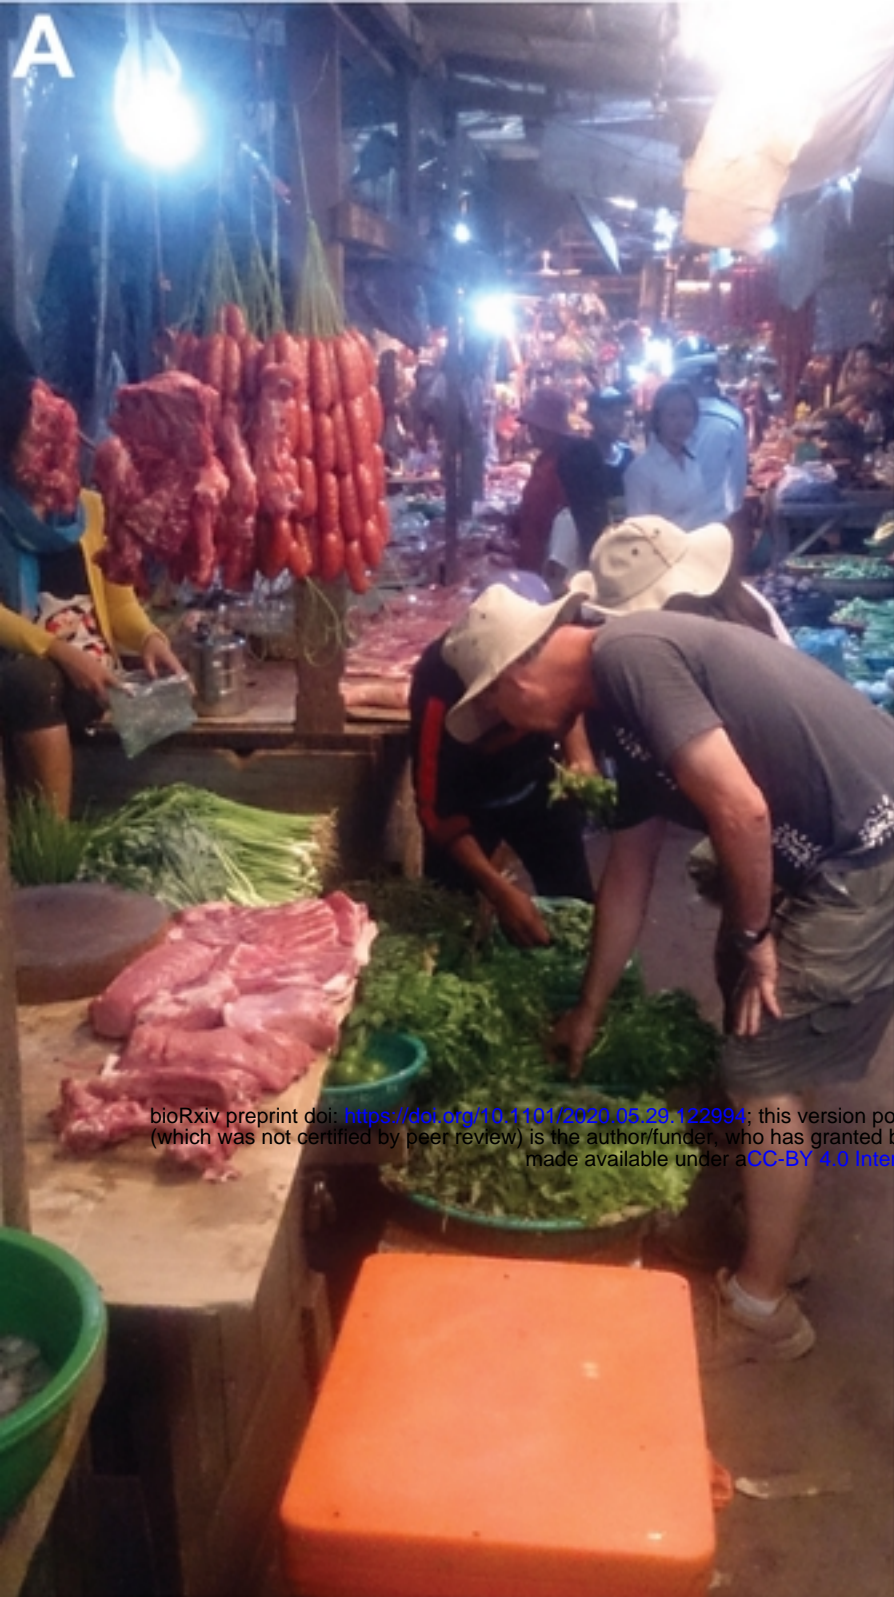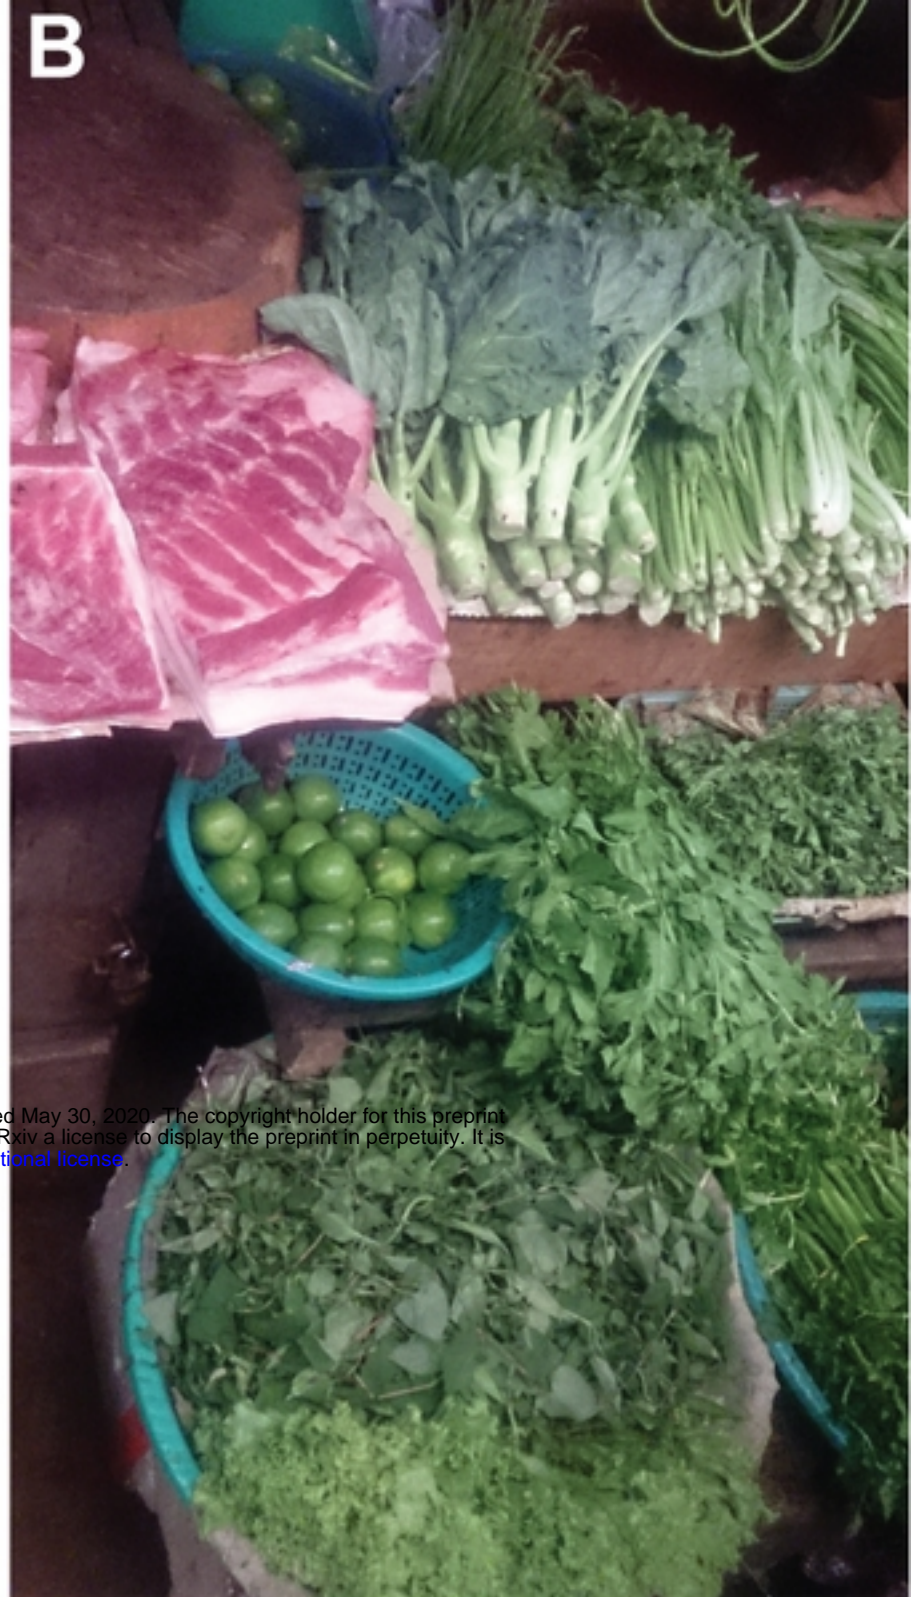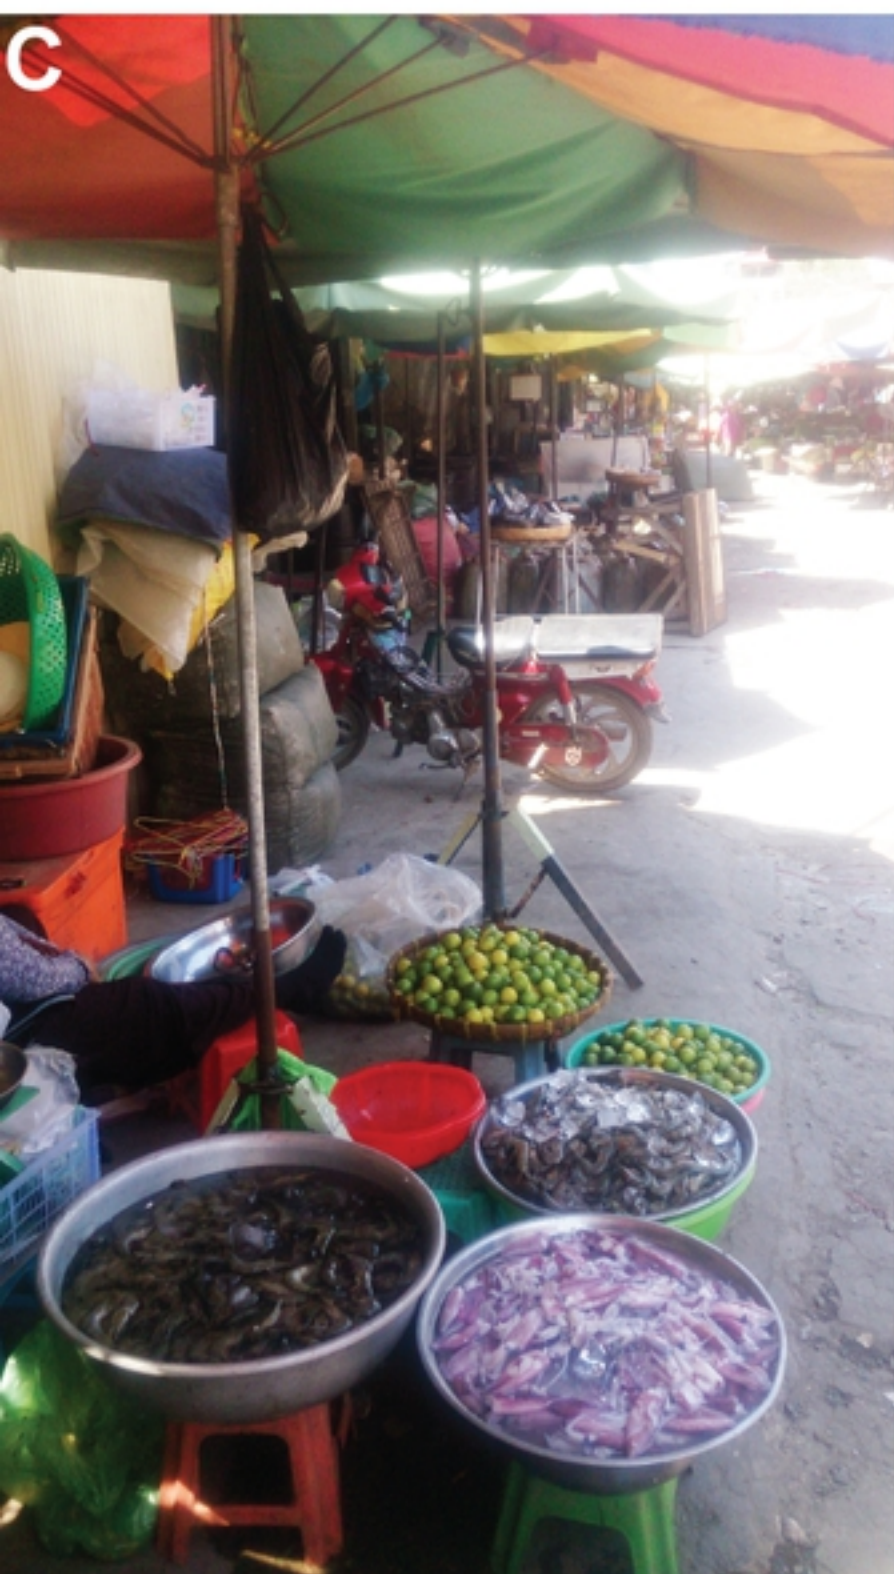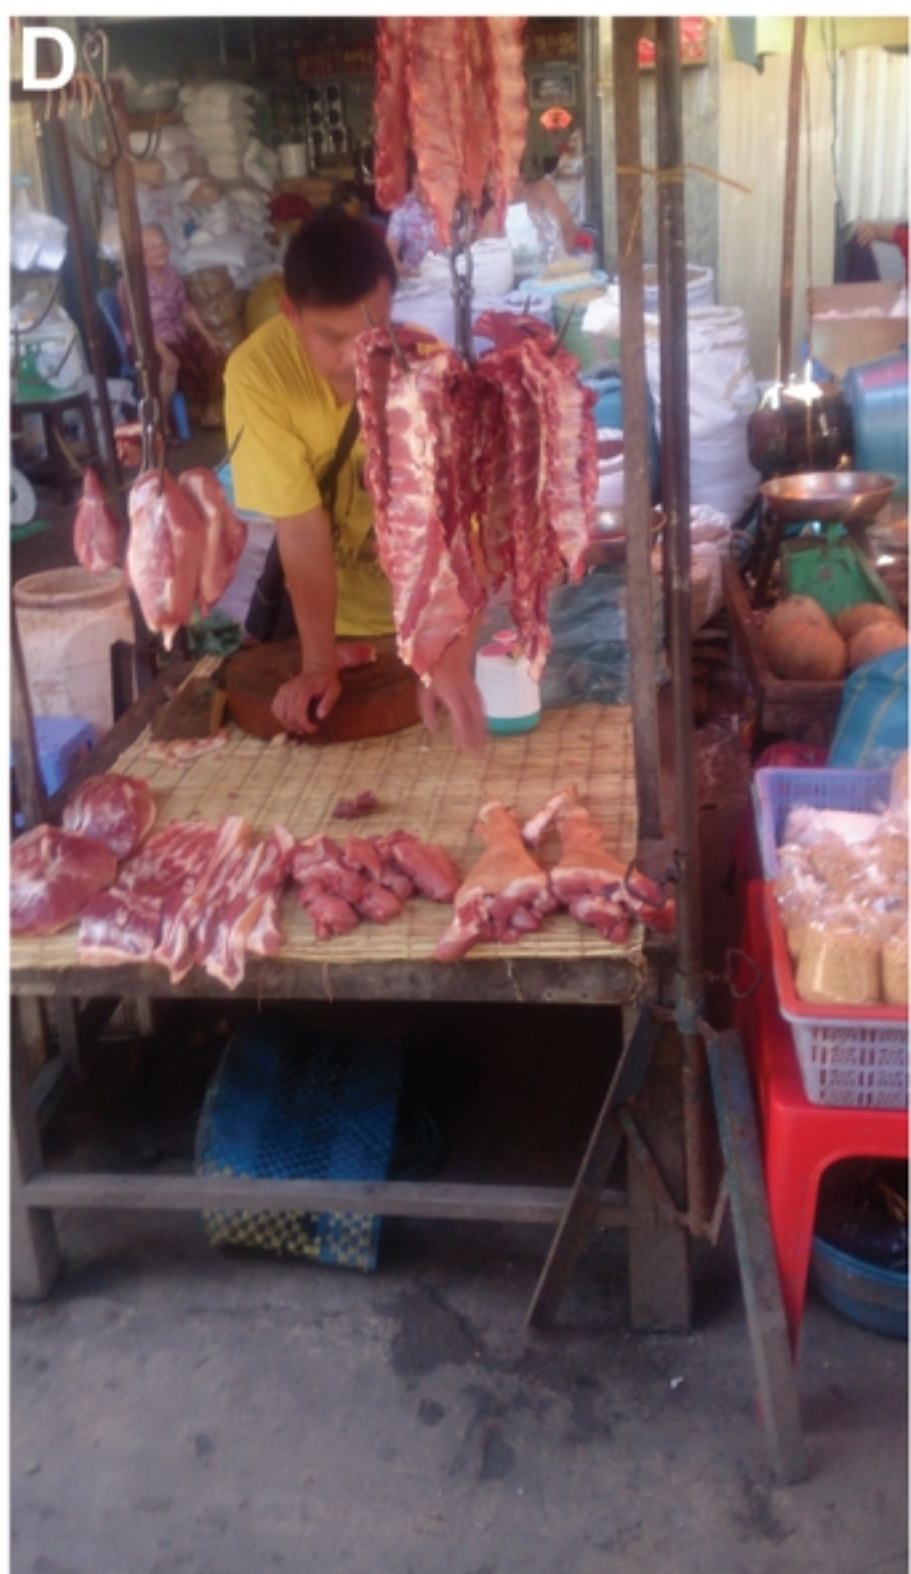

S3 Figure

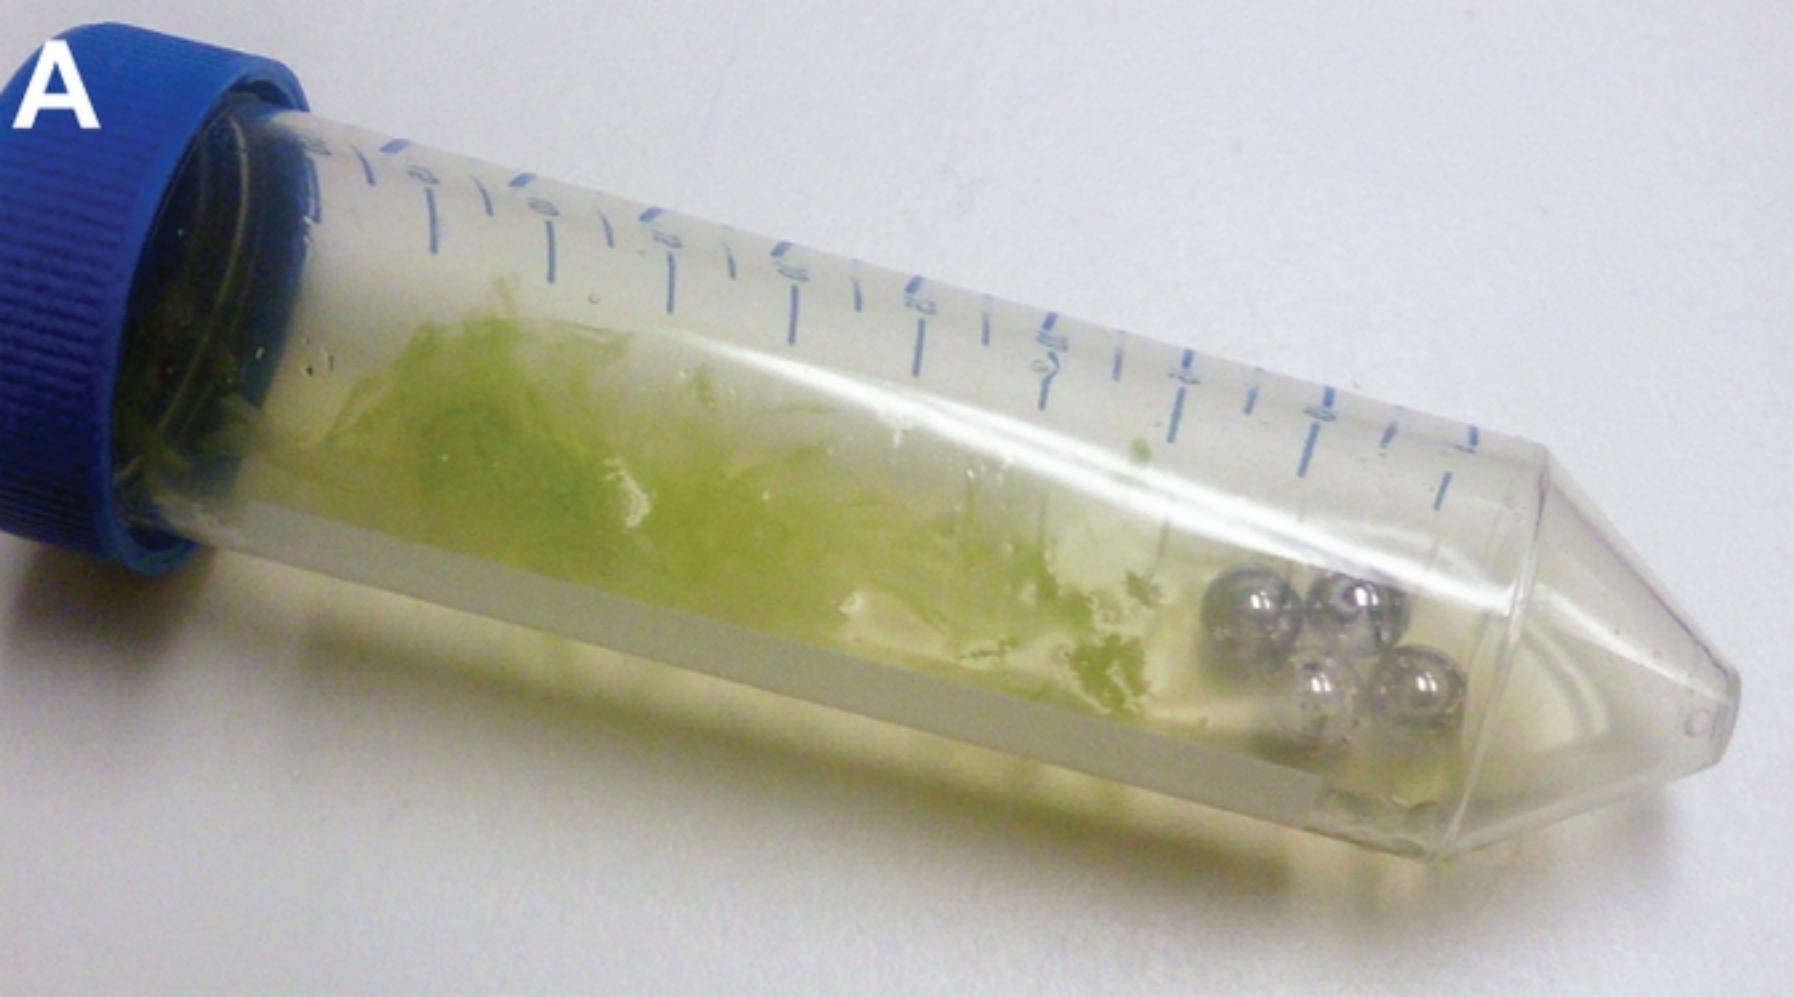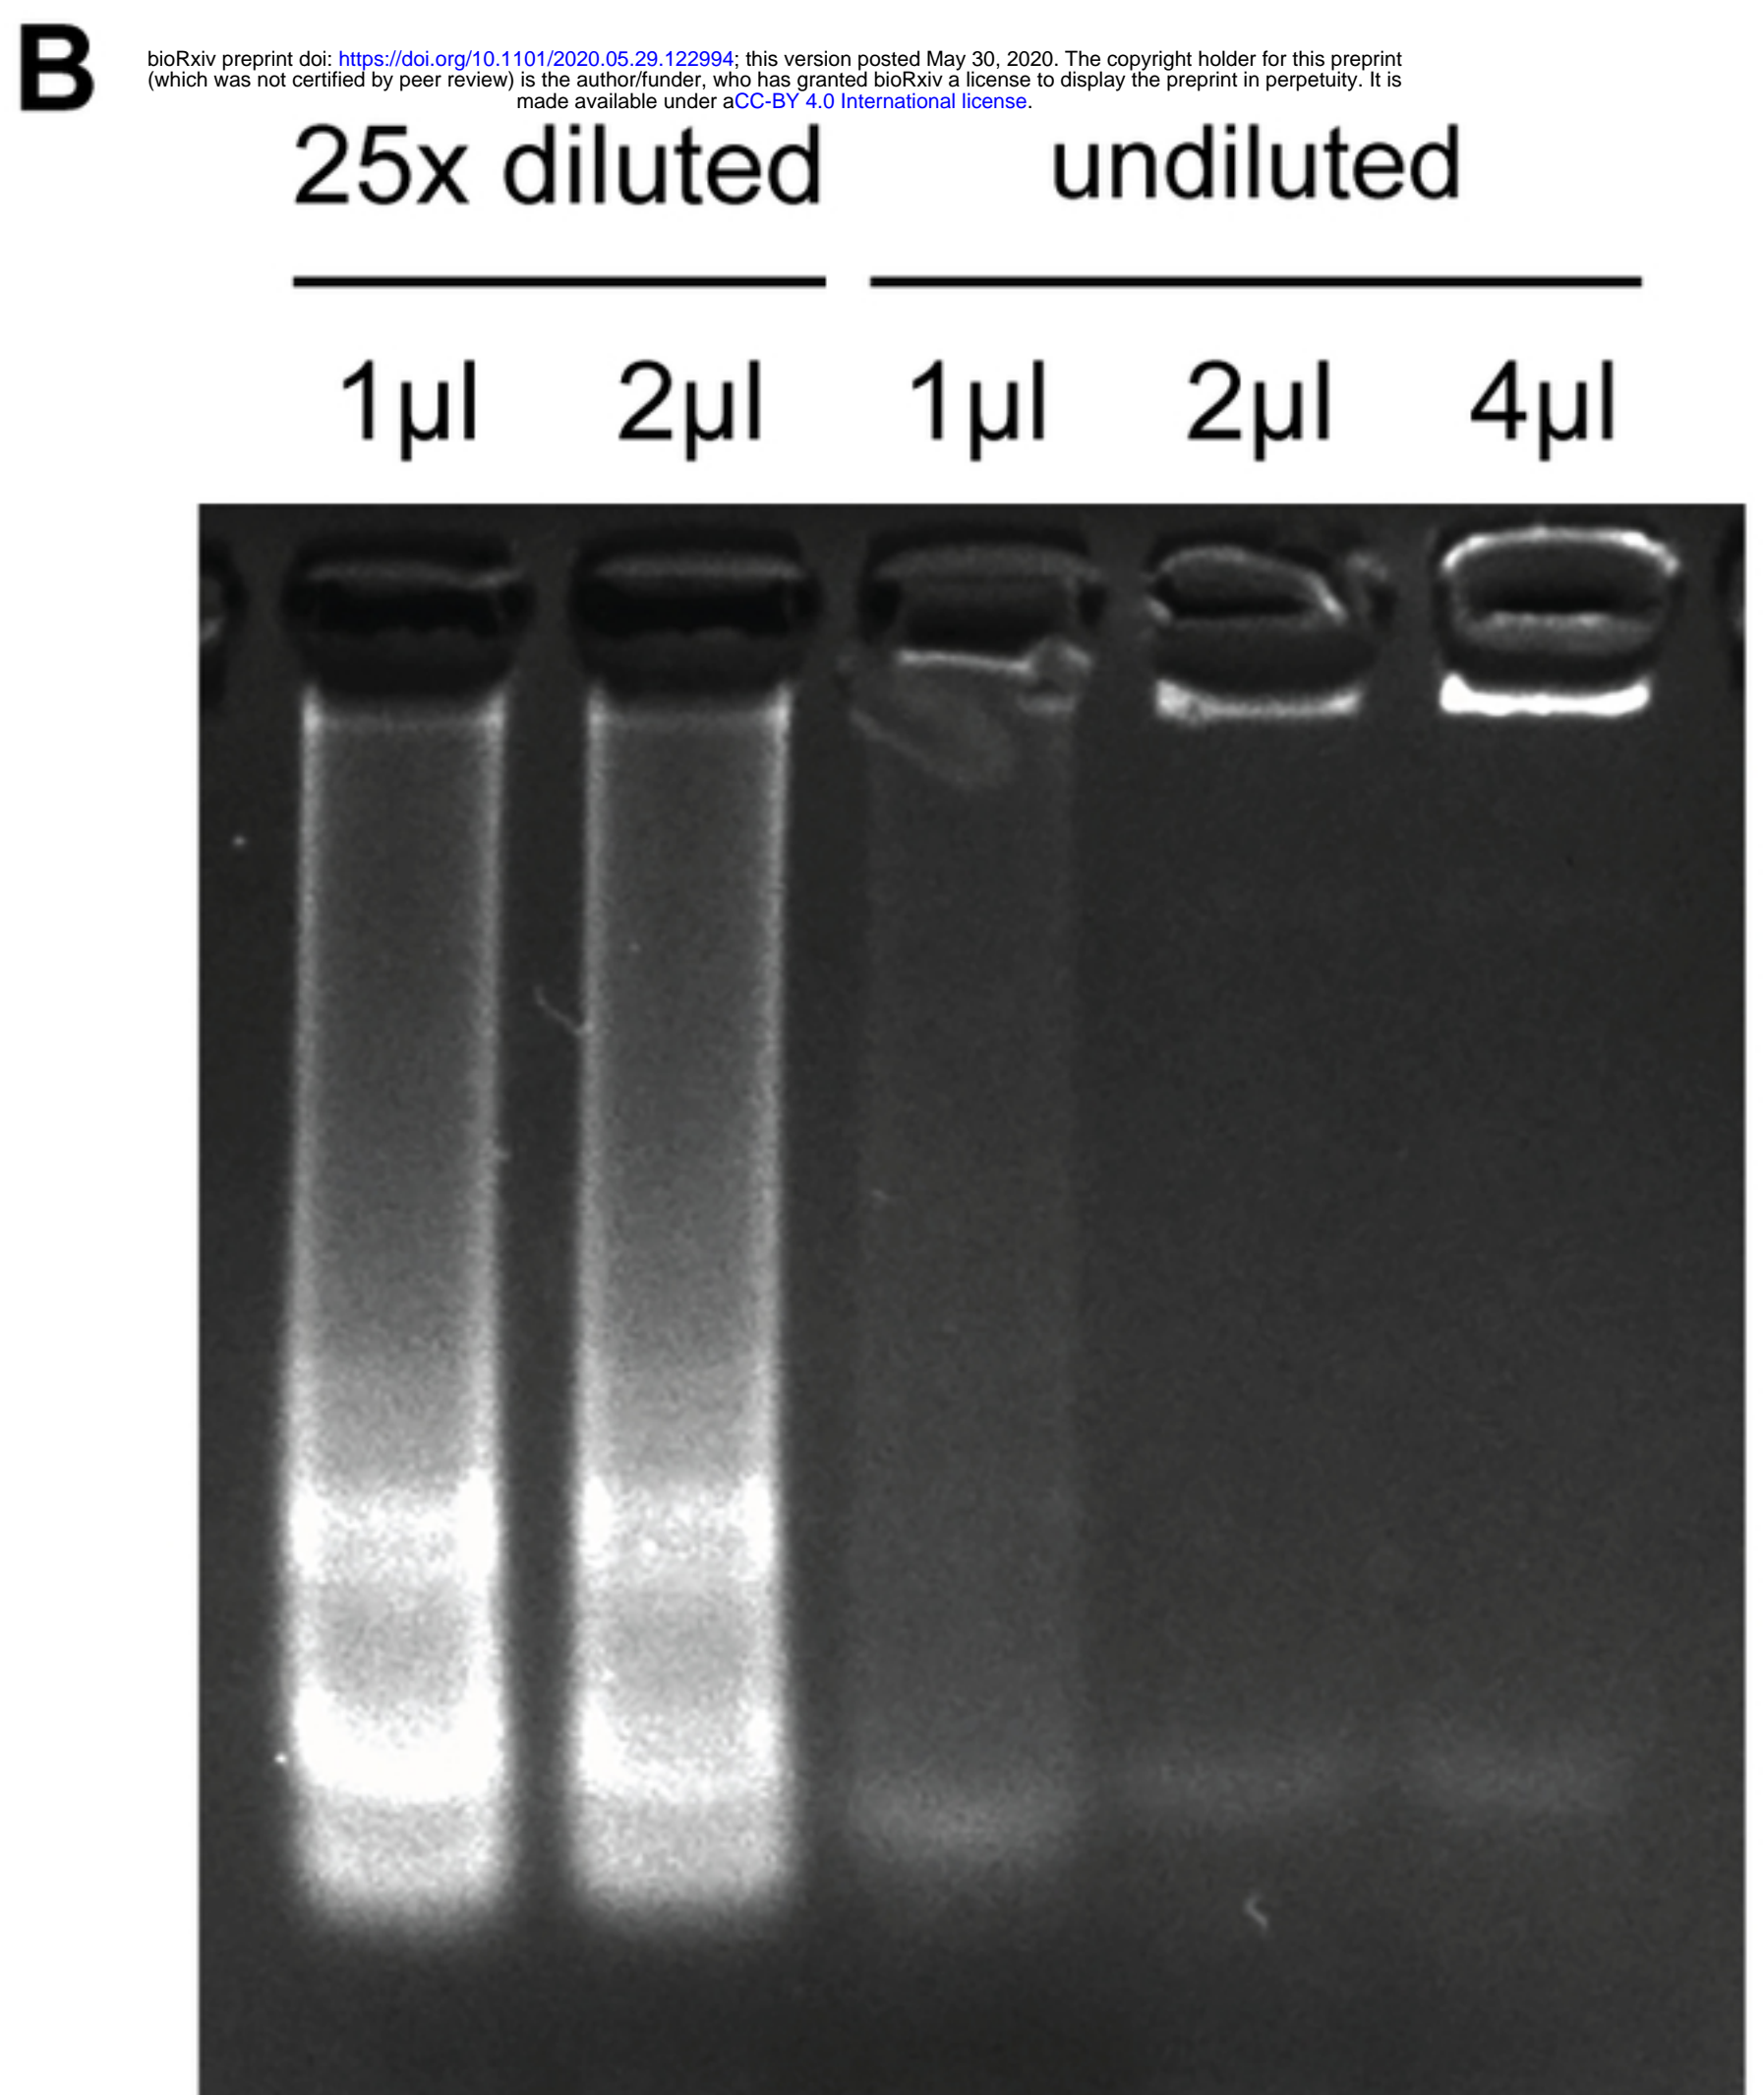

Figure 1

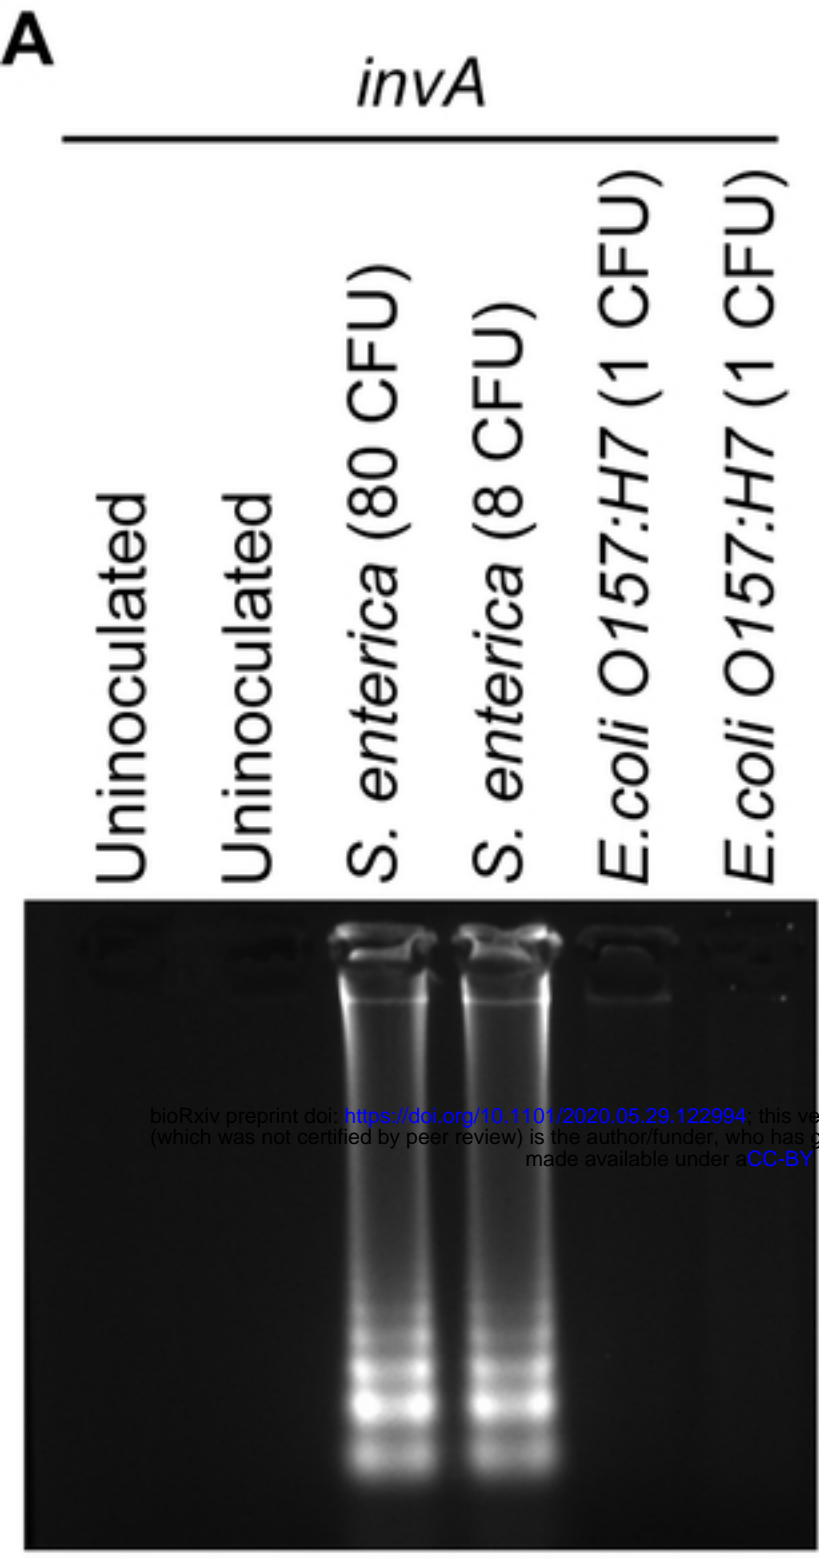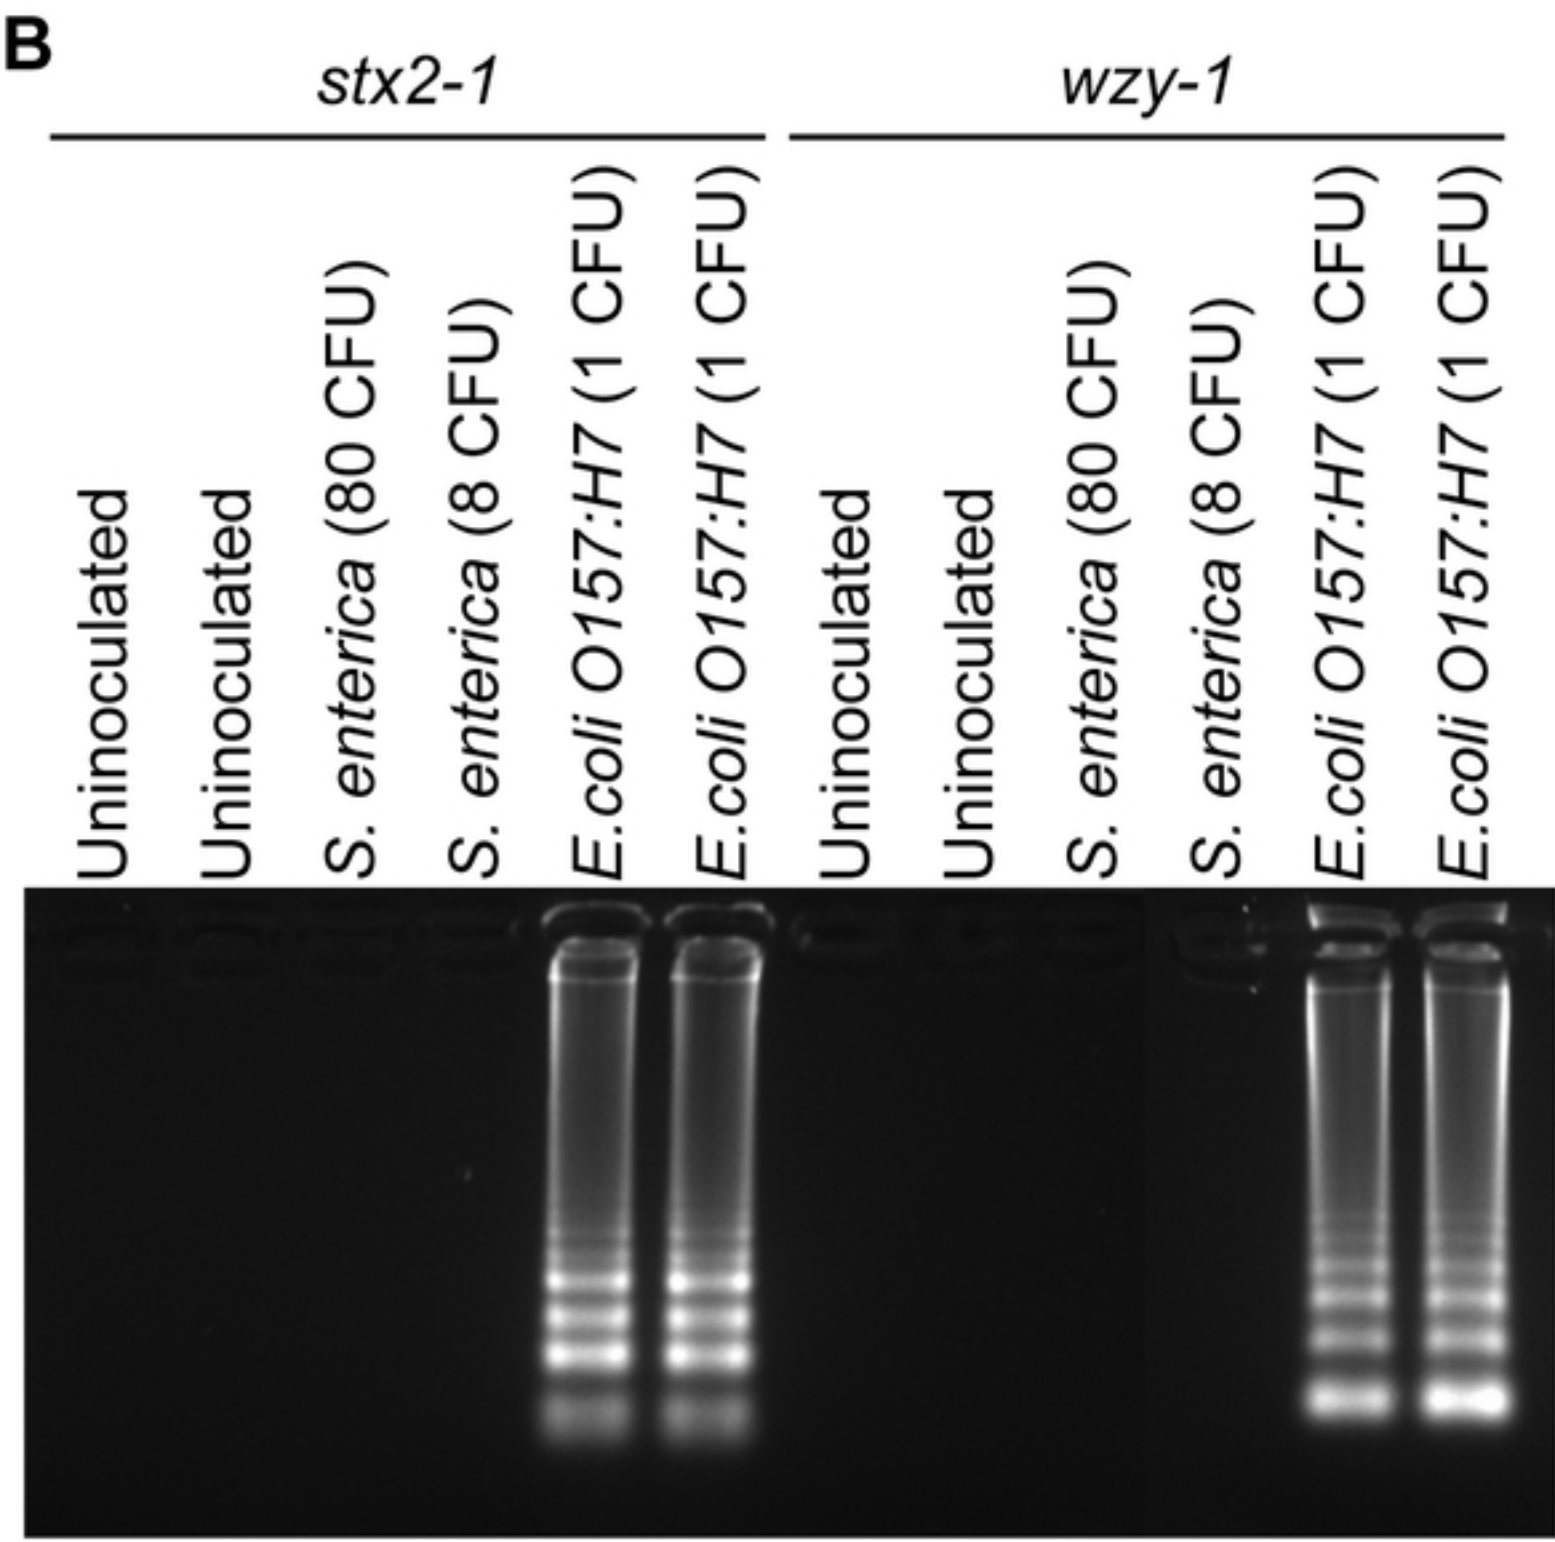

Figure 2

**A**

|   |   |   |   |           |
|---|---|---|---|-----------|
| + | + | - | - | Betaine   |
| + | - | + | - | Trehalose |

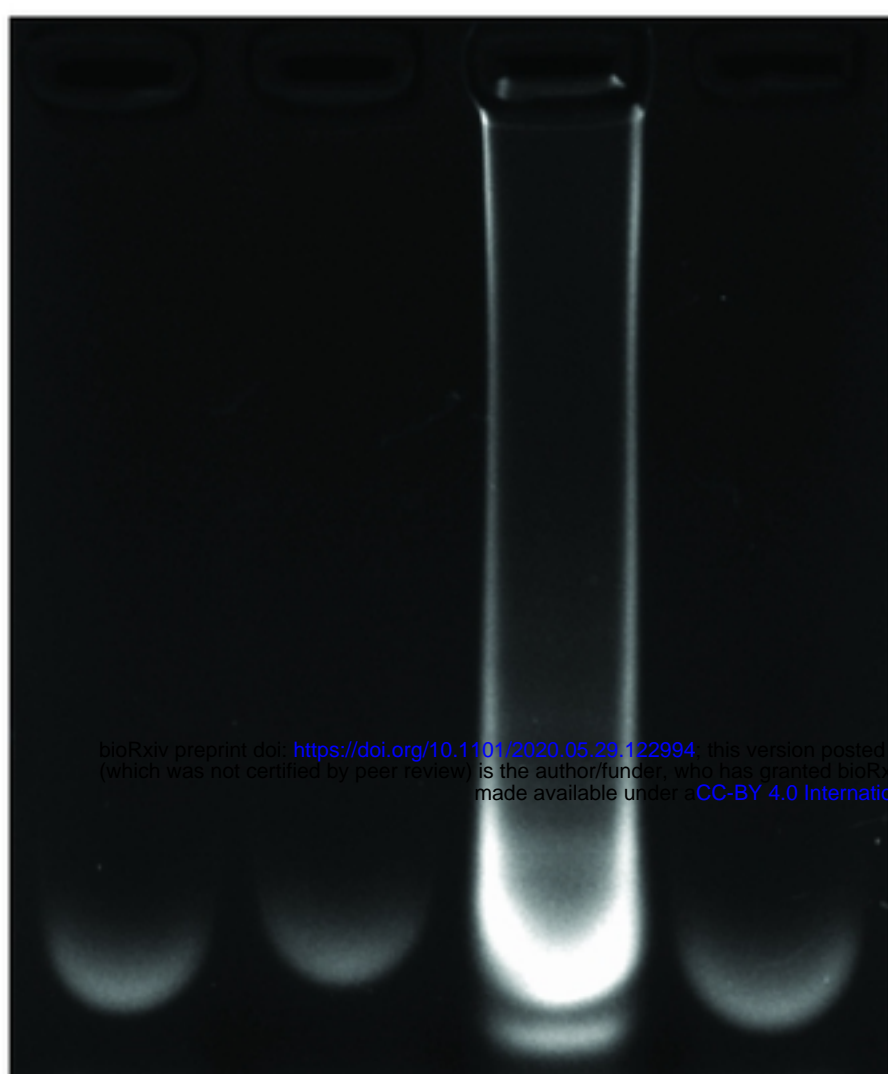**B**

Days at room temperature

---

4      8                      21

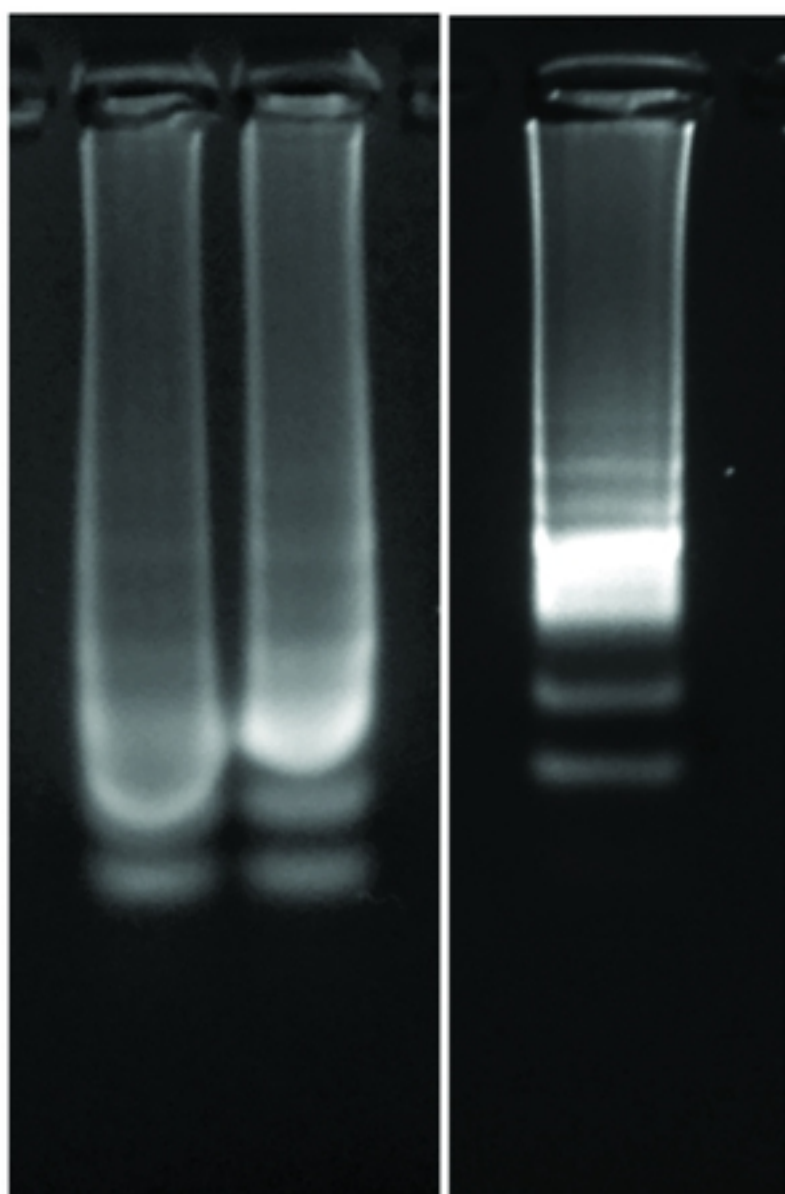

Figure 3

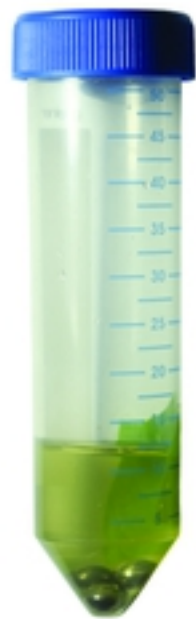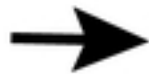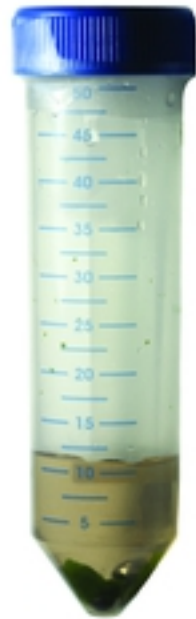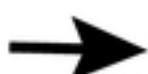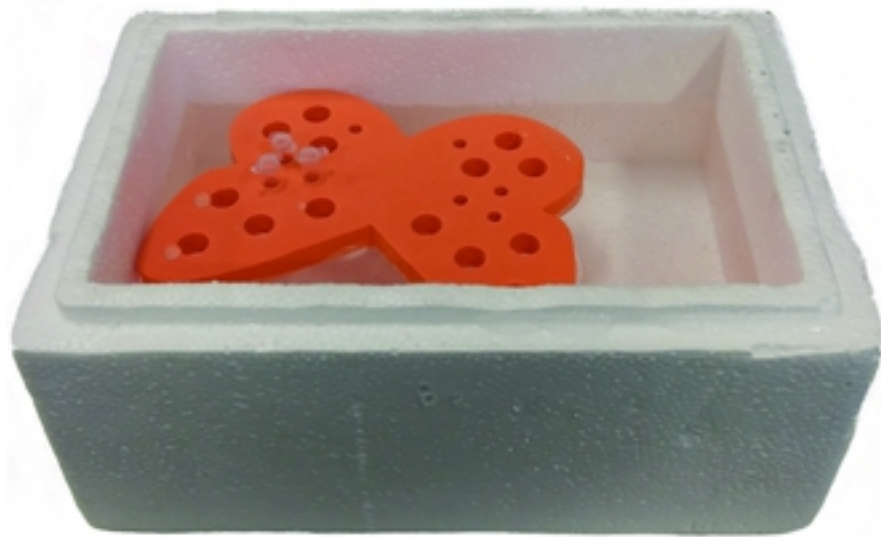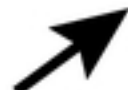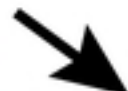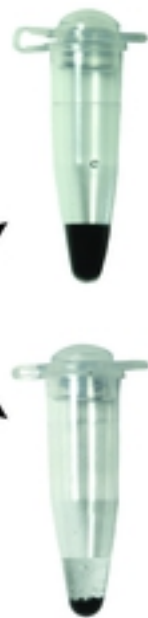

**Sample maceration and enrichment**  
(overnight incubation)

**Cell lysis**  
(30 minutes)

**DNA amplification**  
(50 minutes)

**Flocculation readout**  
(30 seconds)

Figure 4



**A**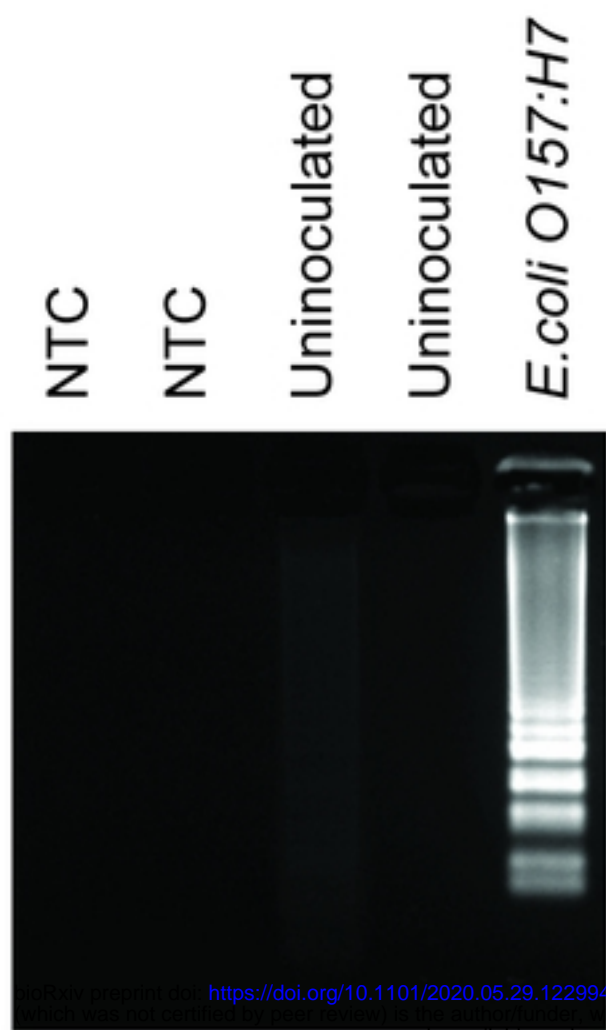

<https://doi.org/10.1101/2020.05.29.122994>; this version posted May 30, 2020. The copyright holder for this preprint (which was not certified by peer review) is the author/funder, who has granted bioRxiv a license to display the preprint in perpetuity. It is made available under aCC-BY 4.0 International license.

**B**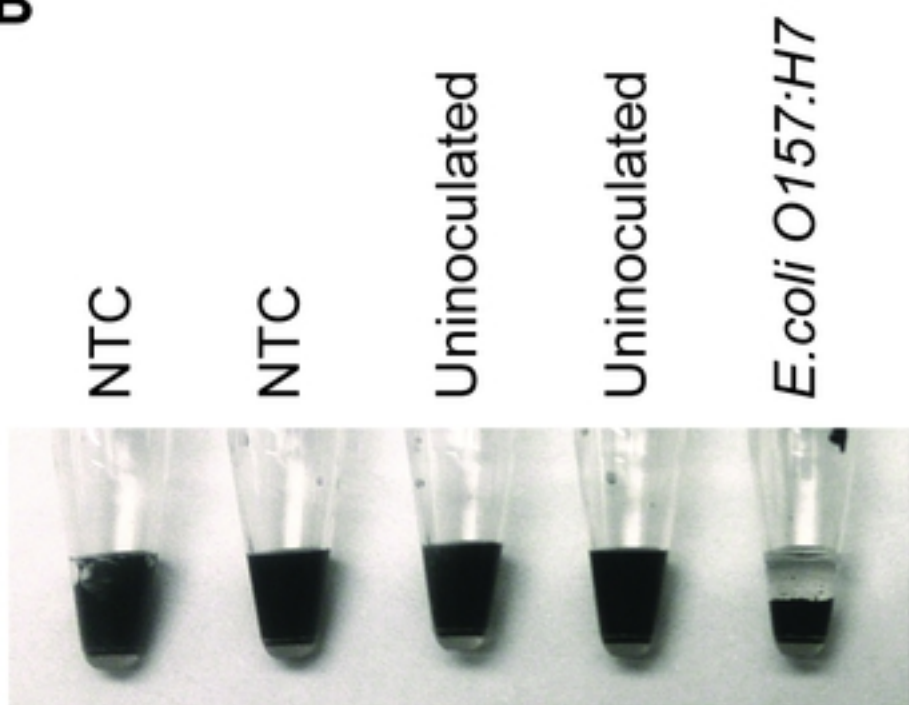**C**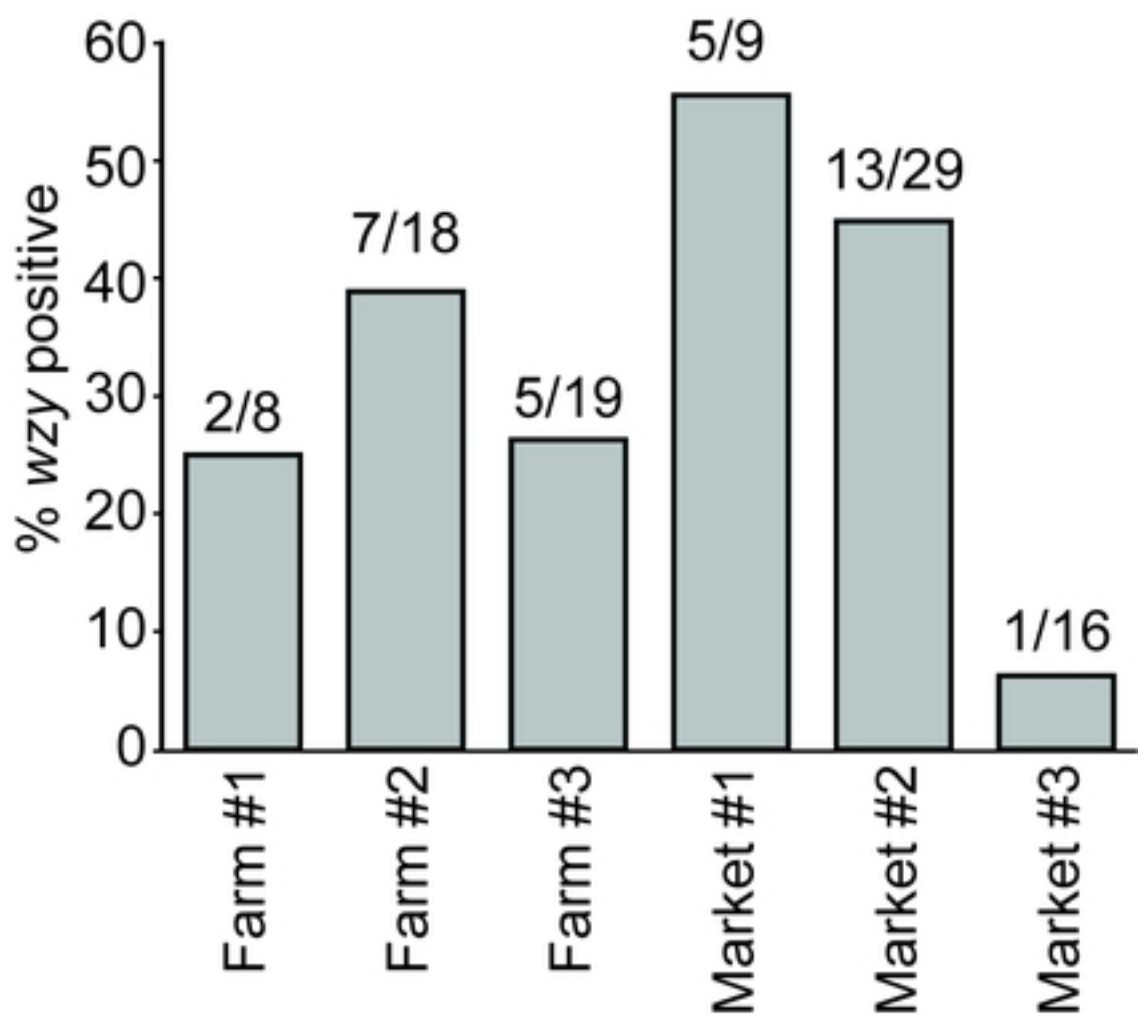

Figure 5

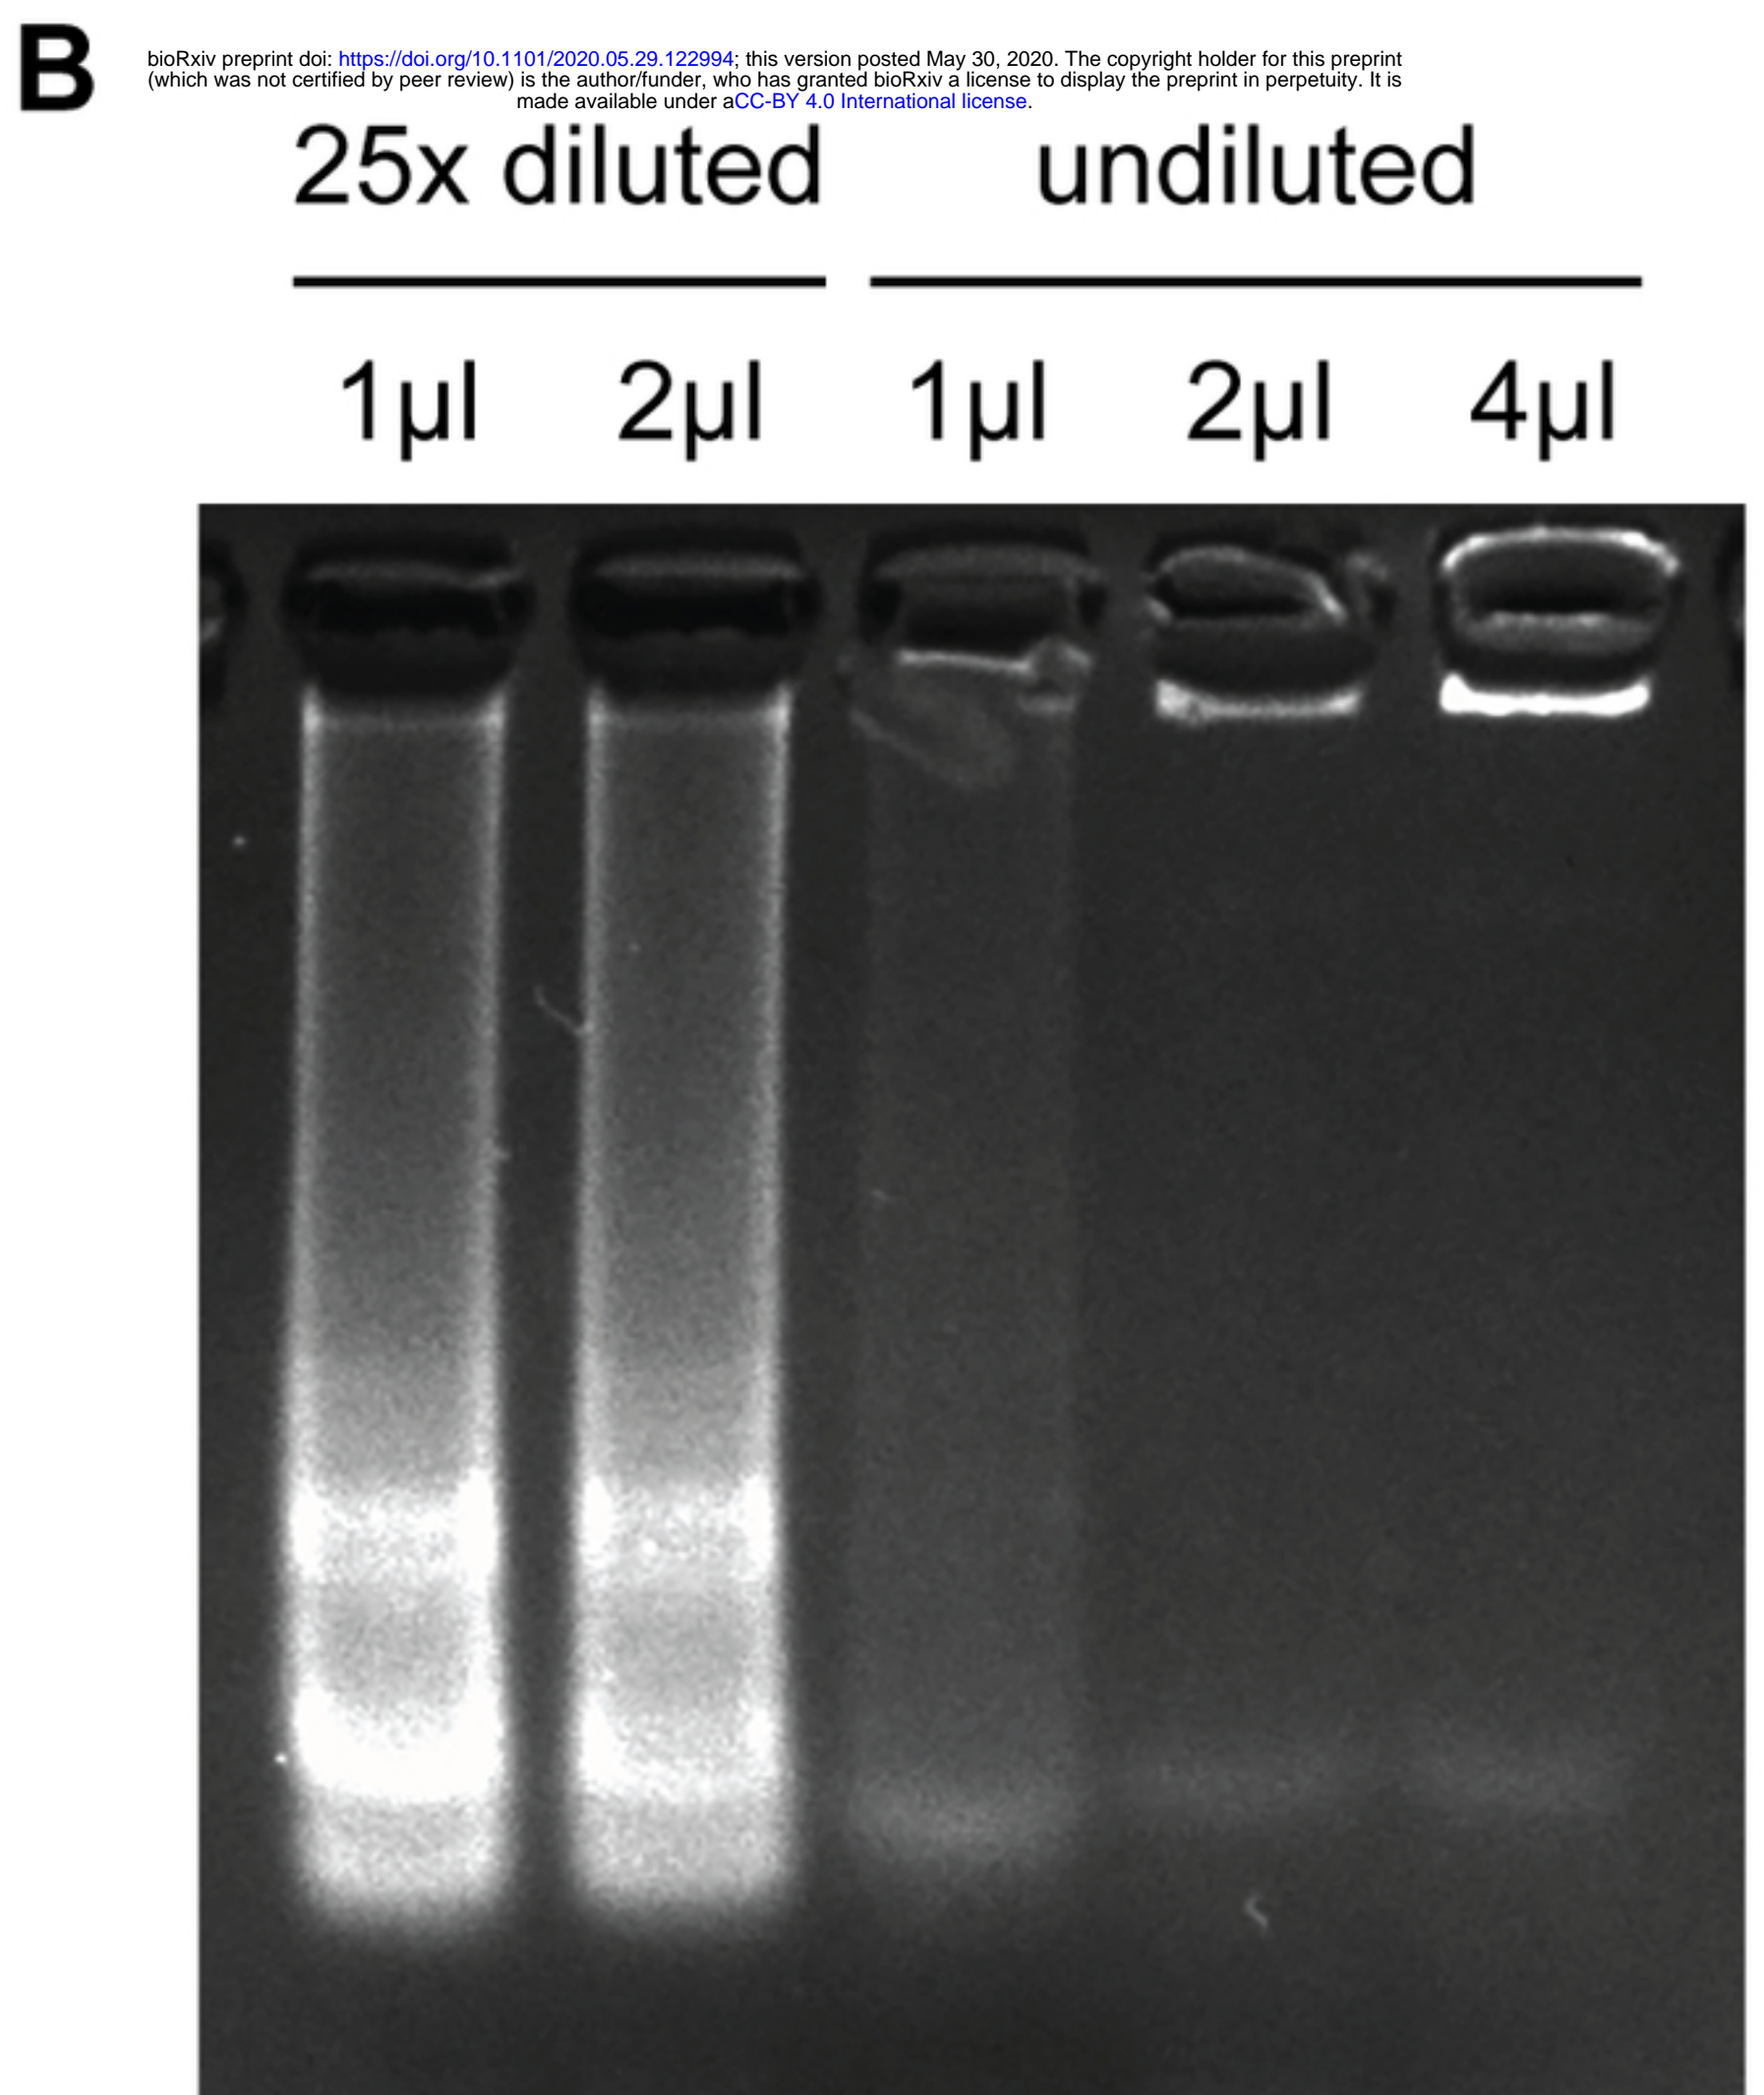

S1 Figure
